# Supplementary material for: Stromal Senescence following Treatment with the CDK4/6 Inhibitor Palbociclib Alters the Lung Metastatic Niche and Increases Metastasis of Drug-Resistant Mammary Cancer Cells
Source: Cancers (Basel). 2023 Mar 22;15(6):1908. doi: 10.3390/cancers15061908 (PMC10046966; doi:10.3390/cancers15061908)
Supplement: Supplementary file 1 [file cancers-15-01908-s001.zip › Supplemental File S1.xlsx]

## Sheet: Fig S2B
Genes downregulated by 10 days of Palbociclib but not by 10 days of Palbociclib + AP20187
	Palboiclib		Palbociclib + AP20187
Gene	log2FC	P value	log2FC	P value
Ttk	-4.8922	1.74404e-05	-1.4042	0.037002
Ankle1	-4.8055	4.35024e-05	-1.31043	0.0638103
Neil3	-4.75245	5.79755e-05	-2.88697	0.00135856
Pimreg	-4.71082	2.33919e-05	-2.31118	0.00285498
Ska1	-4.53297	0.000224427	-2.004	0.0177528
Shcbp1	-4.10375	0.000156939	-0.981426	0.157881
Depdc1a	-4.03657	0.000346599	-1.37769	0.0733609
Iqgap3	-3.60524	0.000284985	-1.01433	0.150019
Birc5	-3.56987	0.000142635	-0.948544	0.15629
Cenpf	-3.43762	5.05201e-05	-1.74576	0.00827023
Ncapg	-3.24858	0.000857037	-0.423446	0.548584
Ccnb1	-3.23322	0.000543976	-0.316062	0.636771
Kif2c	-3.07869	8.25587e-06	-0.709809	0.134889
Mki67	-2.99666	8.49725e-05	-0.591049	0.300819
Dlgap5	-2.93245	0.000226327	-0.580111	0.327407
Cdca3	-2.8895	0.000567323	-0.840456	0.195233
Top2a	-2.71888	9.47434e-05	-1.18725	0.035449
Pclaf	-2.65602	4.60947e-05	-0.810058	0.107734
Aspm	-2.60455	0.000152785	-1.10617	0.0437125
Tnfrsf13c	-2.41814	3.35703e-05	-0.666956	0.141931
Stil	-2.40957	0.000262162	-0.71873	0.165101
Spag5	-2.40161	2.71697e-05	-1.44278	0.00292923
Melk	-2.39881	0.000269213	-1.93987	0.0014686
Ndc80	-2.19291	0.000148991	-0.73311	0.113782
Ccnb2	-2.1614	2.69121e-05	-1.40389	0.00176664
Cdca2	-2.119	0.000198393	-0.372811	0.401044
Cenpi	-2.06091	0.000186254	-0.897027	0.0494274
Kif11	-1.97557	9.81156e-06	-1.07471	0.00420723
Fcrla	-1.93748	0.000127702	-1.01987	0.0198756
Sh2d1a	-1.92658	0.000614533	-1.71519	0.00150613
Kif22	-1.91636	4.6476e-05	-1.32135	0.00168897
Ccna2	-1.86605	0.000150899	-1.50544	0.00110932
Bcl11a	-1.83129	1.4964e-05	-0.700525	0.0414443
Rrm2	-1.82827	0.000313606	-0.557265	0.190622
Cma1	-1.82527	0.000623961	-1.50819	0.00283968
Ly6d	-1.79965	1.24224e-05	-0.613632	0.0650598
Itgae	-1.78901	2.11418e-06	-1.01448	0.00135567
Cacna1i	-1.75493	3.14316e-05	-1.25456	0.00102262
Rubcnl	-1.68829	1.13916e-05	-0.537489	0.0795527
Cenpe	-1.68242	0.000788059	-1.02595	0.0231536
Tbx21	-1.65337	0.000699347	-0.996265	0.0240118
Bub1	-1.64808	0.000449564	-0.970072	0.0212205
Ms4a1	-1.60911	3.91608e-05	-0.689808	0.0368996
Kif23	-1.57717	0.000180909	-0.602078	0.0930063
Cd19	-1.57518	3.00315e-05	-0.82142	0.0115555
Racgap1	-1.56674	6.76813e-05	-1.16224	0.00135993
Blk	-1.49414	4.27837e-05	-0.6427	0.0381684
Spib	-1.46759	0.000382942	-0.443486	0.21155
Siglecg	-1.45873	0.000201729	-0.664715	0.0521579
Slamf6	-1.4531	0.000511381	-0.319386	0.370252
Cd79a	-1.44327	0.000289613	-0.623817	0.0729992
Cd48	-1.40841	0.000330133	-0.210609	0.52618
Fcmr	-1.39999	0.000768056	-0.844334	0.0263719
Kmo	-1.39664	0.000350409	-1.1654	0.00174843
Ubash3a	-1.39161	0.000840043	-0.761518	0.0427329
Bank1	-1.36764	0.000707671	-0.424457	0.228671
Trim59	-1.36743	7.23867e-05	-0.70418	0.0190603
Ryr1	-1.36529	0.000809699	-0.623876	0.0822076
S1pr5	-1.35107	0.000730211	-0.931109	0.012197
Cxcr5	-1.35088	0.000336221	-0.554141	0.092949
Cd5	-1.34394	0.000407588	-0.758379	0.0266279
Cd79b	-1.34138	9.76362e-05	-0.718725	0.0179093
Fcrl1	-1.32062	0.000307621	-0.661998	0.0411516
Ercc6l	-1.29956	0.000499727	-0.809013	0.0170519
Trbc2	-1.29872	9.23212e-05	-1.01463	0.00113126
Map4k1	-1.25901	1.25101e-05	-0.661782	0.00765315
Cxcr3	-1.24628	0.00078317	-0.926141	0.00791856
Foxm1	-1.21247	0.000360277	-0.60546	0.044632
Gpr68	-1.21054	0.000145675	-0.608259	0.030493
Cd52	-1.20562	0.000152131	-0.451678	0.10078
Ccl17	-1.20199	0.00056851	-0.740466	0.0204107
Ltb	-1.16827	0.00011987	-0.523914	0.0479426
Ccr7	-1.16451	0.000391577	-0.639136	0.0310271
Zfp831	-1.16155	0.000538562	-0.456207	0.12337
Spn	-1.14338	0.000173537	-0.666233	0.0153479
Plbd1	-1.14173	5.81018e-05	-0.682372	0.00721756
Wdfy4	-1.14019	8.22208e-05	-0.2795	0.251699
Lck	-1.12682	0.000925289	-0.90293	0.00551178
Sell	-1.11601	0.000756126	-0.881585	0.0052955
Irf5	-1.10332	0.000569673	-0.386014	0.171414
Slamf9	-1.10174	0.000432676	-0.455404	0.10063
Gimap3	-1.08459	0.000176558	-0.810944	0.00275829
Gpr183	-1.0845	0.000886197	-0.405618	0.161763
Ikzf3	-1.08353	0.000204548	-0.784418	0.00397891
Stat4	-1.0775	0.000871612	-0.56804	0.0536402
Coro1a	-1.01161	0.000101118	-0.542059	0.0196972
Was	-1.00793	0.000427562	-0.214469	0.388396
Ptprcap	-0.982959	0.000250584	-0.671829	0.00699144
Ptpn22	-0.96499	0.000341202	-0.620896	0.0124908
Sh2d2a	-0.949603	0.000652794	-0.699308	0.00784235
Lsp1	-0.927606	7.17165e-05	-0.407555	0.0460291
Dtx1	-0.882278	0.000568348	-0.48277	0.0387777
Arhgdib	-0.777122	0.00089787	-0.318321	0.132851
Gap43	-0.768077	0.000595296	-0.465742	0.0242426
Nrm	-0.757127	0.000876575	-0.361262	0.0805175
Inpp4b	-0.713766	0.000544521	-0.19163	0.294696
Irf8	-0.685285	0.000492298	-0.220521	0.207571
Il16	-0.611054	0.000598261	-0.429517	0.0105063
Lmnb1	-0.610586	0.000764103	-0.326955	0.0499352
Prex1	-0.599268	0.000405755	-0.147687	0.324194

## Sheet: Fig S2C
Genes upregulated by 10 days of Palbociclib + AP20187
	Palboiclib		Palbociclib + AP20187
Gene	log2FC	P value	log2FC	P value
Saa3	-0.603602	0.748708	7.88611	8.17125e-05
Ighg1	0.640897	0.670806	6.5285	0.000258844
Cxcl2	0.982806	0.497145	5.68007	0.00028076
Cxcl5	-0.435778	0.778483	5.439	0.000726271
Kng2	-0.0948633	0.947685	5.34078	0.00011616
Ly6i	-0.718073	0.57136	5.28649	0.000262191
Cxcl1	-0.922067	0.52085	5.24563	0.000190586
Mmp12	-0.304787	0.761532	4.86055	9.45791e-05
Cxcr1	1.23659	0.21609	4.68093	0.000103932
Stra6l	0.891011	0.381356	4.62959	0.00011073
Gpnmb	0.400085	0.620319	4.34223	5.33668e-05
Ccl3	-1.79537	0.143544	4.15465	0.000531905
Chl1	-0.673255	0.562417	4.12938	0.000929412
Wfdc17	-0.357998	0.71205	3.92003	0.000702233
Lcn2	-0.111549	0.887244	3.91684	0.000155108
Ighg3	-2.525	0.0553574	3.8518	0.000664565
Rgs16	-0.812299	0.339761	3.7369	0.000104581
Tnfrsf9	-1.77316	0.100458	3.60304	0.000879478
Spp1	0.382577	0.631468	3.59992	0.000386179
Fxyd4	-0.0434161	0.964886	3.51697	0.000832023
Trem2	0.586942	0.419489	3.47328	9.38312e-05
Col24a1	0.0116752	0.989334	3.45755	0.000243317
Ces2c	0.546688	0.534628	3.41716	0.000485493
Ctsk	-0.43379	0.576019	3.41358	0.000302533
Arnt2	-0.190661	0.814006	3.2563	0.000373013
Marco	1.0895	0.121715	3.22329	0.000157619
Wfdc21	-0.0288425	0.969588	3.20465	0.000313204
Slc39a2	0.444448	0.518063	3.15721	0.000141086
Ccl6	0.639529	0.303322	3.10591	8.17847e-05
Gdf15	-0.380577	0.614251	3.00839	0.00035477
Lilrb4b	0.101968	0.880005	2.76802	0.000531304
Mansc4	2.20622	0.00637256	2.75496	0.000890831
Zranb3	0.314776	0.592433	2.68188	0.000125318
Slc6a20a	0.165166	0.790005	2.64914	0.0002896
Gdf6	1.21217	0.0942494	2.6491	0.00078001
Timp1	0.0819694	0.905136	2.61484	0.000871546
Lhfpl2	-0.356801	0.585288	2.56431	0.000655598
Hsd11b2	0.392964	0.510079	2.50443	0.00024117
Proz	-0.110979	0.863376	2.48209	0.000690773
Bdkrb1	-0.413543	0.531942	2.47997	0.00067732
Clec5a	-0.0790709	0.903175	2.42726	0.000981056
Slc5a1	-0.172574	0.777116	2.27227	0.000945348
Tnfrsf23	0.0469177	0.931057	2.17914	0.000400723
Chil1	-0.160966	0.768657	2.16256	0.000799116
Cd68	-0.26675	0.633247	2.11997	0.000965489
Ctsd	0.0901202	0.845032	2.09934	0.000171637
Sfrp1	0.0314061	0.950292	2.07567	0.000440479
Pla1a	0.8212	0.0843109	2.00894	0.000177411
Ptgir	0.504175	0.330675	1.96322	0.000782381
Cpxm1	0.175618	0.723283	1.90998	0.000771917
Vnn1	-0.324451	0.501795	1.8714	0.000661584
Syt12	0.18587	0.716719	1.86434	0.000898759
Cyp7b1	-0.138891	0.775699	1.84131	0.000729803
Fabp5	-0.0556457	0.899412	1.77666	0.000536005
Noxo1	0.18204	0.688818	1.77085	0.000566844
Lrp12	-0.0790092	0.85633	1.70816	0.000604784
Phex	0.424581	0.300532	1.60122	0.000541907
Rtn4rl2	0.424817	0.283304	1.53781	0.000500598
Nabp1	0.0357478	0.920854	1.42457	0.000536238
Itgb8	0.693851	0.039658	1.3064	0.000373616
Nat8f7	0.793855	0.0265348	1.30611	0.000594741
Pld3	0.00535559	0.987543	1.30467	0.000842213
Ftl1	0.0721039	0.798536	1.17998	0.000308613
Nhs	0.456446	0.126143	1.16888	0.00038676
Syngr1	0.131475	0.629054	1.10436	0.000345267
Mark1	0.245525	0.305406	0.955628	0.000368365
Ror2	0.541622	0.0257052	0.916441	0.000448772
Pdzk1ip1	0.136688	0.451528	0.66282	0.000962222

## Sheet: Fig S2D
Genes downregulated by 10 days of Palbociclib or by 10 days of Palbociclib + AP20187
	Palboiclib		Palbociclib + AP20187
Gene	log2FC	P value	log2FC	P value
Mxd3	-3.59292	0.000392269	-3.69984	0.000276165
Gpr141b	-3.3372	3.29543e-06	-2.72676	2.34361e-05
Xcr1	-3.12468	2.18652e-05	-2.19032	0.000527402
Gcsam	-2.29539	4.78374e-05	-2.62728	1.00033e-05
Nccrp1	-2.2515	0.000228021	-2.38221	0.00011605
Septin3	-2.09767	8.09552e-07	-2.36939	1.23969e-07
Timd4	-2.04593	0.0004852	-2.66716	3.57945e-05
Flt3	-1.82949	8.11268e-07	-1.52692	9.2931e-06
BC147527	-1.63329	0.00035114	-1.48408	0.000809195
Ccl5	-1.63117	9.54865e-05	-1.77081	3.55943e-05
Hepacam2	-1.51182	1.40851e-08	-1.66194	2.40419e-09
Klrd1	-1.42173	8.63237e-05	-1.76371	5.53737e-06
Nkg7	-1.34453	0.000240305	-1.37161	0.000186857
Cd209a	-1.32693	0.000213429	-1.42201	9.52537e-05
Tagap	-1.22979	5.46858e-05	-0.974459	0.000666847
Klrb1b	-1.19562	0.000234162	-1.13074	0.000402517
Itgb7	-1.16011	5.05007e-06	-0.913236	0.000109773
Jaml	-1.12156	9.86924e-05	-1.16517	6.05976e-05
Klrk1	-1.09304	0.000691243	-1.20037	0.000259837
Cd7	-1.05797	0.00028492	-0.978141	0.000601656
Tbc1d10c	-1.03595	6.9798e-06	-1.04019	6.2902e-06
Il2rb	-0.96459	5.42525e-06	-0.908112	1.23509e-05
Grap2	-0.882883	0.000225114	-0.918703	0.000140113
Fam78a	-0.805363	9.7407e-05	-0.654879	0.000871138

## Sheet: Fig S2E
Genes downregulated by 10 days of Palbociclib + AP but not by 10 days of Palbociclib alone
	Palboiclib		Palbociclib + AP20187
Gene	log2FC	P value	log2FC	P value
Tlr11	-1.56565	0.0015179	-3.27606	8.32378e-07
Nxnl2	-0.901712	0.0383564	-2.22008	4.50199e-05
Gimap7	-1.16218	0.0082292	-1.73715	0.000294176
Eomes	-1.35742	0.00287238	-1.61783	0.000618354
Sytl3	-0.683559	0.0422442	-1.49382	0.000118385
Gzma	-1.16849	0.00352751	-1.42129	0.000652431
Nusap1	-1.02842	0.00270006	-1.20153	0.000674817
Prf1	-0.983408	0.00212315	-1.074	0.000952733
