# Supplementary material for: Stromal Senescence following Treatment with the CDK4/6 Inhibitor Palbociclib Alters the Lung Metastatic Niche and Increases Metastasis of Drug-Resistant Mammary Cancer Cells
Source: Cancers (Basel). 2023 Mar 22;15(6):1908. doi: 10.3390/cancers15061908 (PMC10046966; doi:10.3390/cancers15061908)
Supplement: Supplementary file 1 [file cancers-15-01908-s001.zip › Supplemental File S2.xlsx]

## Sheet: Fig 4E
Genes differentially expressed in HUVEC treated with palbociclib for 72 hours, with |log2(fold change)| > log2(1.5) and p < 1e-06
Gene	log2FC	PValue
UBD	10.6152	1.87079e-11
TMEM217B	9.72454	3.74312e-09
CCDC144NL-AS1	8.93374	1.9281e-07
CCDC194	8.67016	9.46298e-07
MX2	7.9967	3.85207e-07
MAGED4	7.92143	1.17127e-10
IL33	7.64125	4.97655e-16
RAB3C	7.54543	6.29236e-09
OR2I1P	7.43816	5.14123e-11
GDF7	7.23699	2.59632e-18
CD36	6.62578	7.53628e-07
GJA4	6.5278	3.76134e-17
TG	6.45709	1.25013e-07
NUPR1	6.39615	4.72339e-11
VCAM1	6.39224	4.082e-17
SEMA3G	6.36003	8.52933e-16
MMP28	6.34911	3.5265e-14
ACSM3	6.2657	4.15522e-18
MS4A6A	6.21747	1.57398e-08
NOTCH3	6.12166	2.1898e-09
RSAD2	6.01857	2.11294e-10
EGR2	5.90145	5.22022e-07
EGR3	5.81623	1.93741e-11
SELP	5.8133	3.01647e-13
GJA5	5.66003	1.68302e-12
CX3CL1	5.62013	1.65135e-15
CFH	5.55467	1.05748e-17
MATN2	5.55279	2.55853e-13
ABCA9	5.51633	1.33602e-12
SESN3	5.47104	6.06836e-15
CHRNA1	5.359	9.10984e-12
FILIP1	5.28786	2.62197e-19
CA11	5.28132	1.77504e-08
PCDHB10	5.2521	2.44005e-08
CXCL11	5.18496	4.85334e-07
PROM1	5.10073	9.75361e-07
TNFSF10	5.0362	4.86365e-19
KCNMB4	5.0208	1.66198e-08
PDK4	4.94798	8.31241e-11
LIMCH1	4.91467	8.6009e-08
EPSTI1	4.88774	1.22359e-11
TRIL	4.742	3.87448e-08
SHC2	4.73762	1.85223e-15
SEPTIN4	4.70897	7.48763e-09
IFIT2	4.70504	6.00155e-12
SYT17	4.6967	4.16042e-07
OAS1	4.6752	1.62813e-15
KLRG1	4.64931	9.48515e-08
ABCA6	4.55225	2.46586e-15
PIK3IP1	4.514	3.22992e-15
GALNT15	4.47168	4.3845e-15
IFIT3	4.45295	1.19593e-14
PCDHB15	4.38495	1.7253e-07
IGF2	4.34969	1.24716e-10
COL1A2	4.32639	8.86684e-15
FAXDC2	4.30848	1.13815e-11
ENPP2	4.28489	4.38117e-08
PCDHB14	4.2091	1.69665e-09
NCAM2	4.20359	1.86863e-09
RBP1	4.1879	2.94055e-08
BST2	4.16065	2.32306e-12
IFI27	4.14811	8.41786e-09
DEPP1	4.14035	1.06988e-17
LGALS9	4.11881	1.69704e-14
EPHB1	4.11738	3.34244e-12
LINC02701	4.09039	1.05744e-07
CCDC40	4.08604	2.7397e-07
LDLRAD4	4.06562	4.48765e-13
PCDH19	4.05691	1.45277e-12
GPRIN3	4.04859	7.8068e-12
TAGLN	4.00413	3.03443e-21
CCND2	3.99706	3.25718e-13
IGF1	3.98674	7.68957e-09
DIRAS3	3.9589	8.45294e-10
ABCA4	3.95543	2.28607e-13
CD34	3.95169	2.86179e-22
SEMA7A	3.89778	2.20986e-10
TIMP3	3.89608	8.99012e-14
FBXW10B	3.88393	8.81446e-08
JAM2	3.86088	5.53214e-08
SLC15A3	3.85192	4.46957e-11
SGIP1	3.82438	1.66939e-13
ACOX2	3.81264	3.42005e-07
KLRK1-AS1	3.80421	1.49684e-12
MAN1C1	3.78142	3.49184e-09
PTPRS	3.77372	3.62379e-14
TSPAN2	3.765	3.49321e-10
LINC02981	3.75907	2.47516e-10
GBP4	3.75611	3.23975e-13
CEACAM1	3.75382	1.11428e-09
CMPK2	3.73879	3.82508e-12
LPAR2	3.73544	6.56547e-07
SIRPB2	3.71025	1.26814e-13
SYT14	3.70018	5.81254e-07
CIART	3.68847	4.93881e-07
SLC40A1	3.67497	8.58736e-16
SLIT3	3.6681	4.87721e-07
CDKN1C	3.66031	3.29446e-09
PTGIS	3.65448	7.63929e-14
BMF	3.63211	4.27278e-13
EBF4	3.62934	2.41663e-08
TCIM	3.62927	1.2022e-18
CASC15	3.60957	5.55233e-14
A2M	3.60007	9.13631e-19
MMP11	3.59925	1.50288e-13
ADAMTS10	3.59393	1.81471e-10
HMCN1	3.5902	1.38685e-15
LRP1	3.58066	2.25171e-11
CD200	3.57966	7.22016e-12
IFI44	3.57094	6.58834e-15
GPC5	3.56623	1.20178e-08
OLFML2A	3.54845	1.77766e-10
FBLN5	3.54807	3.12151e-14
PCDHB13	3.52162	5.5361e-09
MN1	3.5192	1.13679e-12
CD69	3.46851	1.34866e-11
PTCHD4	3.46274	5.89384e-12
HAPLN3	3.43314	3.03315e-07
TRO	3.42295	1.29081e-14
CASP4LP	3.3886	2.32077e-16
BGN	3.36613	1.70417e-21
OLFML3	3.35384	1.8307e-09
IFIH1	3.34321	5.20665e-15
CTSF	3.34088	2.63455e-16
ABCA1	3.3146	7.82928e-16
CERS4	3.30864	1.05758e-07
SATB1	3.29922	1.63042e-12
SPINK5	3.2942	1.15097e-09
ZFHX2	3.28748	6.70697e-07
BCL2L11	3.28525	1.79801e-15
CSPG4BP	3.27808	9.38911e-07
CFB	3.27193	5.26305e-08
PODXL2	3.26907	3.7011e-11
MMP24	3.2658	5.43036e-08
IFIT5	3.26396	6.28229e-14
CPA3	3.25807	9.56204e-07
FABP4	3.25093	1.21321e-17
MGP	3.2491	1.67685e-18
FLVCR2	3.24538	1.67387e-07
CXCL12	3.24092	7.86122e-13
ADAMTS13	3.22784	6.01306e-08
GOLGA8M	3.21651	7.42191e-07
ICAM1	3.21214	2.86032e-18
TMEM86A	3.21037	1.64267e-08
CPNE5	3.19583	2.31533e-13
SEMA6A	3.19007	3.16973e-07
TGFB2	3.18919	4.63633e-17
SEZ6L2	3.18228	3.13461e-13
PCDHGA4	3.18112	2.65016e-12
MFAP2	3.18029	1.75242e-15
ARMH4	3.17783	4.06928e-11
SYNGR1	3.16978	4.60297e-09
H19	3.15615	3.84643e-08
PLA2G4C	3.14799	4.20987e-17
HAS3	3.14389	6.63386e-09
TMEM140	3.14146	3.6169e-16
ADCY4	3.1281	4.01323e-18
SULF1	3.10568	2.31053e-07
HERC6	3.09762	6.08037e-12
ADAM19	3.09636	8.46317e-17
DHX58	3.09206	1.98378e-09
FER1L4	3.09044	1.97271e-07
GBP2	3.07979	1.87015e-16
TRANK1	3.07419	3.00308e-13
ZNF610	3.07029	1.29219e-07
IQCN	3.06908	4.74001e-07
MST1	3.02948	1.25165e-10
UBE2L6	3.02944	1.79525e-14
PPM1H	3.01702	3.16807e-07
PAPLN	3.01233	2.63968e-14
SLC16A4	3.0113	1.7061e-09
LINC00323	3.0108	2.93641e-07
ATP8A1	2.98679	6.00932e-11
SAMD9L	2.96182	1.03722e-12
TMEM217	2.93585	7.64851e-07
AMY2B	2.93521	5.76528e-07
SCN3B	2.93247	2.31495e-09
SAMD12	2.93228	3.84159e-10
PDCD4	2.92897	1.60836e-17
OBSL1	2.92389	3.74612e-13
KLHL24	2.91461	3.34147e-15
MRAP2	2.90652	4.6747e-09
CLU	2.90587	9.32618e-20
FIGNL2	2.90546	1.60249e-07
FAM227A	2.89901	7.42113e-07
WNT9A	2.8966	6.2016e-11
PALM	2.88944	9.71403e-13
KLF3-AS1	2.88185	4.73853e-07
SEMA4C	2.86438	5.44967e-14
ZNF793	2.83921	8.81074e-09
CHST15	2.83535	1.31352e-14
EGR1	2.82549	3.05907e-16
APOL1	2.8141	9.46768e-16
C1orf54	2.80971	4.28936e-12
ANGPTL4	2.80396	8.65452e-14
CLIP3	2.79707	1.70229e-11
IRF7	2.79589	2.8346e-11
MAFB	2.78966	9.42018e-08
IRF6	2.78769	1.78019e-15
ZNF154	2.78646	2.68601e-09
B4GALNT4	2.78168	1.18481e-07
ARHGAP28	2.78131	2.07933e-14
DLL1	2.74697	2.54158e-07
FAM189A2	2.74675	3.87888e-14
PBXIP1	2.73031	4.48202e-16
YPEL1	2.71945	1.83162e-09
SSC5D	2.71139	1.31323e-07
COL12A1	2.71051	1.2618e-19
SCN9A	2.70812	2.25703e-08
HERC2P2	2.70669	3.02514e-19
CCL2	2.7059	7.46319e-18
KIT	2.70581	5.46913e-14
IL15	2.69513	1.2977e-07
TSPAN11	2.69502	2.65698e-12
ABLIM1	2.69408	8.71244e-18
RFTN2	2.69065	3.15602e-07
PCDHGA3	2.68387	6.63588e-07
HHIPL1	2.68186	1.66484e-07
CFAP44	2.68159	8.67593e-08
THSD7A	2.67379	9.78266e-16
HELZ2	2.67192	3.32322e-12
PARP9	2.6533	4.77663e-14
HSD17B14	2.65074	1.55112e-08
CBLN3	2.64174	2.18857e-07
IL4I1	2.6079	6.99612e-10
GPR153	2.60752	3.25303e-09
IDUA	2.60058	3.44492e-14
FBXO6	2.59792	1.85147e-07
LINC00607	2.5976	5.91443e-17
LOXL1	2.59109	1.45013e-10
MMP2	2.58956	9.01244e-20
MEG3	2.58767	3.71382e-18
ZFHX2-AS1	2.58256	2.82632e-09
ZNF471	2.5809	1.36299e-07
ZNF117	2.57985	5.0756e-17
TMEM132A	2.57971	1.69698e-17
CADM4	2.57827	7.0174e-10
ARHGEF6	2.57371	3.60733e-11
BTG2	2.55949	2.13081e-15
COL4A1	2.55717	1.42899e-19
YPEL3	2.55383	3.17143e-12
SLC44A5	2.5515	4.6774e-08
ADGRF5	2.55003	4.67949e-18
TCP11L2	2.54332	3.77797e-08
TRAPPC6A	2.54318	4.33566e-09
PCDHGB6	2.53823	8.98774e-08
SLC29A4	2.536	1.32831e-07
CTSK	2.53085	1.39497e-10
DYRK1B	2.52759	1.06891e-12
MTMR9LP	2.52094	4.43177e-13
ADGRL1	2.51957	6.26399e-10
EPB41L1	2.51635	1.90247e-12
MOB3C	2.51574	3.50143e-10
CROT	2.51483	1.07417e-10
BACH2	2.5141	3.06871e-09
ANKRD6	2.50354	3.26818e-10
HERC2P3	2.49443	1.2551e-14
H2AC6	2.48831	3.64815e-07
PLCB4	2.47228	8.99002e-08
TMC7	2.4714	5.78436e-08
SLC22A23	2.46793	5.91632e-11
PARP10	2.46536	1.63607e-12
ERV3-1	2.46505	1.59151e-17
NTN4	2.46429	2.15272e-19
TMEFF1	2.4619	3.43955e-13
DNAH1	2.45956	2.20924e-10
HCN2	2.45581	6.5419e-07
PRICKLE2	2.45401	1.42873e-08
TMEM35A	2.4537	2.50466e-10
PAPPA	2.45366	5.7575e-07
ACE	2.45154	1.9834e-18
CYP27A1	2.45035	9.80592e-12
MAP1LC3A	2.43882	6.26198e-12
ASAH1	2.43821	1.20209e-14
MYL9	2.43652	2.96343e-15
RND1	2.4331	2.26946e-07
TP53INP1	2.41675	2.38413e-17
AP1G2-AS1	2.41576	4.07433e-12
DENND6B	2.41496	4.95295e-10
GAS6	2.41231	4.51312e-17
DDIT4	2.4109	6.68663e-13
GNA14	2.40626	2.63182e-07
ZMAT1	2.40344	1.38723e-10
DAPK2	2.39295	1.08131e-08
ZNF667	2.38514	6.64505e-07
LRATD2	2.38491	3.49823e-16
FLRT2	2.38469	9.97354e-16
PCDHGA2	2.37631	3.68059e-08
MYH10	2.3707	6.36095e-19
SHFL	2.36714	4.883e-14
HES4	2.36712	5.33927e-13
TMEM9B-AS1	2.3656	1.25323e-07
TNFRSF10C	2.36169	2.30538e-14
COL6A1	2.35883	4.48194e-17
PCDHGB4	2.33785	2.4934e-12
SLC2A10	2.31509	3.78844e-12
PARP14	2.31498	1.09853e-08
NIPAL2	2.30744	9.09811e-13
SLC22A17	2.30718	3.48343e-07
HLA-B	2.30353	2.44083e-15
THBS3	2.30169	2.57607e-12
LTBP3	2.2989	8.38111e-17
LBH	2.29744	7.77373e-11
RAB6B	2.29594	5.07546e-10
PRR5	2.29184	4.63973e-08
ISG20	2.2898	2.65733e-07
IFI35	2.28867	3.14228e-08
ADGRA2	2.28654	4.93973e-13
ARHGEF40	2.26643	1.69159e-12
MEGF6	2.2664	2.94989e-17
KIFC2	2.26626	2.39806e-12
TTLL3	2.25398	2.31601e-14
AGRN	2.24744	4.34048e-18
ACSF2	2.24248	1.00023e-09
ZNF862	2.23677	1.14177e-12
LMF1	2.23652	8.66006e-09
CTXN1	2.23647	8.67334e-12
NAALADL2	2.23584	9.44915e-08
PKD1L1	2.23518	1.21124e-10
DRAXIN	2.23087	8.29406e-07
IGFBP7	2.2252	6.39936e-18
ACSS1	2.2248	4.28927e-10
RAMP2	2.22209	7.15375e-13
MRAS	2.21504	6.77223e-10
STAT1	2.21112	9.06136e-08
YPEL5	2.20578	8.44125e-15
SAMD9	2.20404	4.38607e-09
HTRA3	2.20078	1.76929e-12
GAB1	2.19679	1.35372e-12
FCGRT	2.19638	2.69439e-16
CSF1	2.19475	1.13549e-14
COL4A2	2.19425	1.52222e-07
HTRA1	2.19416	1.00134e-17
CTSO	2.19258	3.63514e-12
CCNG2	2.18714	1.77627e-12
AKR1C3	2.18331	1.2483e-07
GBP1	2.1825	3.71833e-15
DDX60	2.18197	1.00787e-12
OCLN	2.17972	9.75326e-11
JUP	2.17909	1.52724e-17
SLC27A1	2.17594	1.1506e-10
CREBRF	2.17493	3.84542e-08
FN1	2.16759	8.89594e-20
TRIM22	2.16728	3.07652e-16
VSIR	2.15157	2.61891e-09
RGS11	2.14938	8.16436e-10
PDGFD	2.14841	4.58832e-13
THBD	2.14014	1.54238e-16
TXNIP	2.12929	3.45514e-13
MDK	2.12742	3.68842e-14
FAM89A	2.12554	2.80006e-09
FUCA1	2.12427	1.37541e-09
GRN	2.12405	5.35749e-18
SELENOM	2.12135	8.51129e-12
TMEM144	2.12016	4.15427e-08
SORT1	2.11863	2.37962e-13
TNFSF15	2.11563	1.79743e-14
CASTOR3	2.11145	2.76137e-10
COL5A1	2.11122	1.293e-16
PCDHGB5	2.10812	8.69679e-12
PLLP	2.10183	8.65536e-09
LZTS3	2.10176	3.24245e-10
C1RL	2.10156	4.62738e-11
GDF6	2.10096	7.85797e-07
FAM171A2	2.10004	8.36491e-08
CALCOCO1	2.09681	1.36609e-13
IRF9	2.09677	1.952e-10
BCAS3	2.09643	7.18276e-11
DDX58	2.09626	1.61773e-10
MAPRE3	2.09543	1.23248e-07
ZNF846	2.09432	4.70466e-07
CES4A	2.09422	2.52981e-07
CYB5D2	2.09339	6.98239e-10
PPP1R9A	2.08858	6.87655e-08
CDON	2.08774	3.27831e-07
CTHRC1	2.08542	7.07461e-14
CDKN2B	2.08521	2.58374e-08
PCDHGB7	2.0804	4.3348e-11
GLIS3	2.07238	9.47715e-08
KANK3	2.06794	6.08299e-08
EFNA1	2.06592	1.30841e-15
NATD1	2.06487	3.81398e-09
SAMD14	2.06484	3.58205e-11
FAM229A	2.06329	3.86181e-07
ZNF219	2.06328	5.27678e-11
GASK1B-AS1	2.0572	4.78536e-09
MXD4	2.05584	1.60511e-16
MAN2B2	2.0423	1.23684e-15
ART4	2.04216	1.56106e-12
JUNB	2.03908	8.33863e-13
SULT1C4	2.03875	2.855e-11
MMRN1	2.03837	2.55589e-17
RTKN	2.03724	1.08599e-09
CELSR1	2.03571	3.81862e-07
CCDC191	2.02883	2.19623e-08
RBM24	2.02493	9.38444e-07
SARM1	2.02419	5.87671e-11
BTBD19	2.02307	1.16024e-13
PTPRM	2.02082	3.5668e-16
COLEC12	2.01727	1.46318e-12
COL5A2	2.01381	2.46785e-17
CYTL1	2.01098	2.28606e-14
LAMC2	2.00876	3.98552e-08
NALF1	2.00665	3.04257e-10
PDK2	2.00285	2.43008e-11
PSMG3-AS1	1.99994	9.39954e-09
ZBTB46	1.99946	2.03376e-09
SP110	1.99925	3.38662e-11
SEMA6C	1.99486	2.45207e-15
GOLGA8N	1.99412	7.46017e-07
SIAE	1.99334	1.78034e-14
FAT1	1.98932	3.90065e-10
TACSTD2	1.9804	6.55676e-14
ARSA	1.97969	2.40384e-12
LRMDA	1.97358	2.30468e-07
PPARA	1.97354	1.78274e-09
CCDC18-AS1	1.97131	1.63959e-07
SNED1	1.96128	5.7671e-12
HOMER3	1.95738	3.03459e-10
SLC25A29	1.95405	1.76322e-10
MYO15B	1.95354	1.41402e-10
PLA2R1	1.94785	4.51358e-12
CXCR4	1.94644	8.85948e-11
CTSB	1.94178	9.92168e-18
SEPTIN5	1.93921	1.53544e-10
PLSCR4	1.93612	8.56637e-16
LRRC27	1.93417	2.45756e-07
PPP1R16B	1.93322	1.33217e-14
CRACD	1.92945	9.99651e-12
GRAMD2B	1.92747	3.67958e-07
STAT2	1.92475	4.6115e-15
VWFP1	1.92308	4.32618e-12
NDRG4	1.91815	1.99829e-11
VWA1	1.91674	1.15357e-10
LINC01013	1.91613	5.11031e-14
BACE2	1.91513	8.49913e-17
FILIP1L	1.91485	8.65625e-16
PCMTD1	1.90999	7.33629e-14
PIGZ	1.90989	1.71316e-07
NFATC4	1.90936	1.10769e-14
TPM1	1.90709	5.39288e-18
FAM110D	1.9064	4.208e-07
ABCG1	1.90477	2.01917e-12
CPQ	1.9046	1.01793e-11
CRELD1	1.90164	1.27031e-12
TMEM8B	1.89818	8.37443e-07
UNC93B1	1.8964	1.63057e-10
ZNF423	1.89625	7.16593e-08
ZC3H6	1.89213	3.69218e-08
PTGFRN	1.89188	4.70442e-16
ARSD	1.88855	1.75773e-13
PROS1	1.88703	1.31791e-10
MFGE8	1.88554	8.92368e-15
DTX3L	1.88367	6.03103e-10
VPS9D1	1.8816	1.82572e-09
CRISPLD1	1.87835	6.41533e-07
GPR137B	1.87764	2.49563e-10
DACH1	1.8775	1.18054e-13
RASSF9	1.87454	4.74099e-07
VWF	1.87445	6.82949e-19
GAA	1.87388	1.38346e-15
CFI	1.8714	3.62001e-10
CDC42EP5	1.8712	6.35607e-13
QRICH2	1.8703	1.83115e-09
ARHGEF37	1.86405	1.41745e-10
DNALI1	1.86365	2.98005e-07
TRPM4	1.86104	1.83275e-10
TANC2	1.85952	2.70216e-12
LRRC37A3	1.85761	4.54423e-08
MANBA	1.8564	1.20196e-11
RRAGB	1.85409	4.70851e-08
KIAA1217	1.85297	5.97214e-13
PXDN	1.84992	5.83456e-18
STK38L	1.84415	3.31587e-14
SERPINB9P1	1.84201	6.21594e-10
VLDLR	1.84107	3.00994e-07
LOXL4	1.84021	2.90148e-07
LRRC75B	1.83952	1.52693e-08
ZDHHC1	1.83731	5.0073e-09
CLSTN3	1.83373	3.67306e-13
FBXL20	1.83341	6.57786e-11
KDM5B	1.83309	4.7511e-15
MMP25-AS1	1.82836	1.40307e-08
TAP1	1.82645	3.47639e-13
CXADR	1.82163	1.38168e-09
ST6GAL1	1.82017	1.56906e-15
LDAF1	1.81796	1.55339e-09
CSF2RB	1.81623	6.92984e-14
TIMP2	1.81033	5.18498e-17
SMIM14	1.80823	1.14515e-10
CORO2B	1.80762	7.1685e-08
NEIL1	1.80761	6.53931e-11
FBXO44	1.80596	3.59279e-09
CXCL2	1.80469	7.81502e-08
GASK1B	1.80063	4.19222e-16
PNMA8A	1.79414	2.24668e-08
MMP15	1.79397	7.15753e-12
TLE2	1.79257	6.37131e-12
PTPRU	1.79077	4.63613e-08
ZNF662	1.78719	1.34881e-07
GSTM2	1.78678	1.23731e-09
SNCAIP	1.78364	6.10261e-13
CPT1C	1.77724	1.12223e-09
DDR1	1.77422	4.17187e-08
FKBP9	1.77419	3.29524e-16
ZNF737	1.77158	1.21454e-07
TSPAN9	1.7661	2.88308e-14
KLHDC8B	1.76286	3.37982e-10
PNRC1	1.76107	1.43665e-09
IQCK	1.75761	3.24504e-08
SULF2	1.75584	3.20035e-16
NISCH	1.75369	1.48448e-16
FAM124B	1.7532	2.90675e-15
GPR173	1.75275	3.79375e-09
USHBP1	1.75142	4.05258e-10
EFNA4	1.74998	2.31131e-09
CACFD1	1.74789	1.90675e-07
SCHIP1	1.74557	2.13709e-10
DKK3	1.74551	7.12756e-16
MEX3B	1.74192	1.77067e-12
PCDH12	1.74095	4.0818e-14
IL32	1.7365	3.9883e-16
PBX1	1.73541	2.75854e-10
WSB1	1.73507	5.90797e-17
TRIM16	1.72881	3.76431e-13
TMEM198B	1.72717	4.44941e-09
FOXO4	1.72709	3.35431e-07
GALNS	1.72188	1.41444e-12
TFDP2	1.72013	2.31624e-10
FTX	1.71891	2.13667e-12
RNF215	1.71257	1.63072e-09
MAGI1	1.71237	1.96356e-11
C1QTNF5	1.70812	1.268e-11
TMOD2	1.70669	1.00897e-09
ZHX2	1.70371	5.79285e-08
CSGALNACT1	1.70313	3.90522e-12
HEXA	1.69964	4.07228e-15
NREP	1.69801	3.30775e-14
SH3YL1	1.69184	6.34035e-10
PLOD1	1.68998	1.67909e-16
STON1	1.68658	1.61656e-08
PLD3	1.68652	7.66596e-14
MYO5C	1.68323	6.64206e-12
SEC31B	1.68275	5.53323e-10
TP53I11	1.67814	4.45264e-14
GTF2IRD2B	1.67751	3.86068e-09
TCEA2	1.67719	1.55026e-10
ZSCAN31	1.67331	2.41593e-08
TRAF1	1.67196	6.61785e-10
DHRS3	1.66971	8.42467e-09
PSAP	1.66807	2.64139e-17
PLXNA3	1.66743	8.8938e-14
RTL5	1.66644	2.81659e-07
SLC7A7	1.66642	3.95476e-12
RGCC	1.66617	1.83194e-14
PLXNB1	1.66571	3.95333e-13
SLC35E2A	1.65952	4.99975e-07
GABARAPL1	1.65663	9.83528e-13
HSPG2	1.65453	1.43612e-18
NMRK1	1.65056	1.05006e-10
COL18A1	1.64854	3.39373e-08
ACCS	1.6469	2.25225e-07
RNF144A	1.64688	1.88752e-11
VWCE	1.6468	2.84046e-09
TPP1	1.64676	1.75904e-15
WIPI1	1.64235	3.06424e-12
TM6SF1	1.63781	5.24504e-12
YPEL2	1.63621	3.58146e-15
BAIAP2-DT	1.63571	9.54724e-09
ZSCAN18	1.63564	1.08576e-09
PLEKHG2	1.63564	2.46987e-14
IGF2R	1.63125	7.85328e-16
SLFN5	1.62544	8.75565e-12
DNASE1	1.62462	6.14825e-09
HGSNAT	1.62449	1.52909e-14
MYORG	1.6232	3.34356e-11
BTN3A3	1.61176	8.61867e-08
SAT1	1.61089	8.47511e-15
TBX1	1.60999	1.8785e-13
ANO8	1.60939	1.3351e-09
HLA-C	1.60799	2.59291e-11
MARCHF2	1.60737	4.58864e-11
MEX3A	1.6044	1.47335e-12
RIPK2-DT	1.6038	5.00041e-07
ORAI3	1.60361	1.62536e-07
FAM78A	1.60342	2.86619e-11
MEGF8	1.60264	3.32355e-14
RTN2	1.59981	8.16047e-07
CCDC120	1.59001	5.9934e-07
GAB3	1.58872	7.7561e-07
SIK2	1.58871	8.01151e-13
DNAJC4	1.58386	9.72121e-09
RHOJ	1.58384	2.44559e-15
FLT4	1.58286	2.25763e-13
ZNF516	1.5815	8.07442e-09
SLC17A5	1.57919	1.16424e-12
LTBP4	1.57875	3.63281e-12
GPRC5B	1.57831	1.22892e-10
JAK3	1.57769	7.61322e-09
SDC3	1.5768	2.88484e-13
DNASE2	1.57483	1.20165e-11
FN3K	1.57349	3.43371e-07
PLPPR2	1.57195	8.40033e-12
TMEM63B	1.56922	5.2276e-13
EPOR	1.56709	8.6455e-09
SLX1B-SULT1A4	1.56612	2.36091e-09
MOV10L1	1.56256	4.44091e-07
SLC30A4	1.5592	7.86915e-08
GIMAP2	1.55818	7.89635e-09
SPATA2L	1.5578	3.79476e-07
ARSG	1.55719	1.29894e-07
PTPRD	1.55463	2.93026e-09
ZNF528	1.55423	8.02006e-09
LTBP1	1.55272	2.4003e-15
WARS1	1.55096	2.0877e-16
PGAP3	1.54944	8.55645e-07
NINL	1.54539	1.19791e-10
FAT4	1.54321	2.94093e-13
KALRN	1.54219	5.67741e-10
BDH2	1.5421	2.99697e-10
OAS3	1.54038	6.15205e-07
CTSD	1.54008	1.60085e-14
NICN1	1.54001	7.03803e-09
A4GALT	1.53999	1.13945e-07
CORO6	1.53856	8.07584e-07
FBN1	1.53831	4.19731e-15
VASH1	1.53809	1.17166e-14
RASA4	1.53409	4.17261e-11
TNFRSF21	1.53307	7.3562e-15
STMN3	1.5327	7.80991e-10
FZD8	1.53235	1.5187e-10
CDIP1	1.53226	1.45545e-12
GOLGA6L5P	1.53217	2.11308e-08
PALLD	1.53162	1.86872e-14
TRAF5	1.52762	1.6594e-09
ZSWIM4	1.52409	4.39583e-08
RWDD2A	1.52319	8.42333e-08
KRBA2	1.52184	2.80101e-09
PALMD	1.51675	5.02521e-14
JMY	1.51642	4.84511e-09
CHSY3	1.51588	9.44317e-09
LMO2	1.51436	1.89685e-11
MAN2B1	1.51428	1.81446e-13
TUSC3	1.50938	7.88204e-14
TDRP	1.5069	3.20285e-07
AHDC1	1.50628	1.31622e-11
RGS3	1.50484	9.35416e-15
PGGHG	1.50311	3.66846e-13
GUSBP11	1.50206	2.31034e-10
RALGDS	1.50163	2.09323e-12
MIB2	1.49675	5.24518e-12
ST3GAL5	1.4947	8.38056e-09
GRINA	1.4947	1.1861e-14
TAPBP	1.49404	4.43474e-14
HERC2P9	1.4918	1.37324e-10
TUBG2	1.49163	1.92599e-07
SMO	1.4899	4.79052e-08
PRRG1	1.48962	4.9518e-12
SCARB2	1.48904	4.32587e-15
NLGN2	1.48892	1.16398e-12
MAGED2	1.48873	3.12063e-15
MCTP1	1.48599	2.09811e-15
TMEM120A	1.48561	6.65778e-11
RNF122	1.48502	1.26515e-09
TPT1-AS1	1.48376	6.30932e-09
GDF15	1.48302	8.49079e-12
MRC2	1.48257	3.37198e-13
RNASE1	1.47714	3.68102e-10
ZNF419	1.47482	3.33371e-07
C17orf58	1.47353	1.31064e-08
IFNGR1	1.46651	1.44089e-12
NRBP2	1.46531	4.23804e-13
BCAM	1.46443	1.0192e-08
RNF207	1.46154	4.51602e-08
ARMCX2	1.45968	5.18783e-14
RHPN1	1.45774	1.16115e-09
CCDC149	1.45529	3.69837e-08
FRAS1	1.45482	2.09615e-09
ITGAV	1.45464	1.27754e-13
TSPAN18	1.45431	6.62299e-15
ING4	1.45304	1.5912e-08
KDM6B	1.4521	9.38606e-12
ARVCF	1.45159	3.97299e-14
CRMP1	1.45125	9.80501e-08
CSAD	1.4498	5.68661e-07
RSRP1	1.44609	1.33407e-12
ZCCHC24	1.44603	3.60953e-08
THEMIS2	1.44577	6.38189e-08
IL27RA	1.44362	8.86237e-07
NID1	1.44312	5.46951e-16
PCAT19	1.44311	1.29393e-10
BTG1	1.43765	3.45568e-14
INSR	1.43654	2.18488e-09
BMP1	1.43513	2.50872e-11
HOXD1	1.435	3.2664e-10
LMCD1	1.42893	7.60102e-08
GIMAP1	1.42753	3.73332e-10
GTF2IP4	1.42276	9.85313e-14
KLC4	1.42237	1.959e-08
LRRC3	1.42044	9.92555e-09
SUMF1	1.41859	4.1008e-13
NAB2	1.41616	1.55035e-07
PGPEP1	1.41375	2.75983e-08
PLXND1	1.41214	1.87168e-15
SLC30A3	1.41023	2.98549e-07
LAP3	1.41012	6.73952e-13
EPHA4	1.40993	9.69721e-09
BMP4	1.40788	7.77633e-14
ZNF48	1.40682	4.64354e-08
ZNF397	1.40679	9.40378e-07
TMEM30A	1.40631	2.4436e-14
SRPX2	1.4058	5.35639e-14
STAG3L5P	1.40532	5.20443e-07
CTSA	1.40468	7.13548e-14
FRMD6	1.40406	1.49163e-13
ZNF561	1.40226	2.69002e-11
HID1	1.4016	2.33167e-11
UBA7	1.39891	7.42569e-11
TNFAIP8L1	1.39814	6.19933e-13
PECAM1	1.39509	8.10468e-16
PPP1R3B	1.39349	4.03778e-14
SMPD1	1.39147	1.95065e-13
GLIPR2	1.39142	2.14467e-09
IGFBP2	1.38865	2.86564e-13
RHOB	1.38761	2.17193e-16
ZFYVE1	1.38734	2.92887e-11
TNFRSF10B	1.38612	3.04145e-15
TMEM150A	1.38583	1.56459e-08
BTN3A1	1.38564	1.2604e-08
CUTALP	1.38426	4.64258e-10
C14orf132	1.38089	5.40749e-08
FAM214A	1.37627	3.49991e-10
SOX18	1.37526	1.24205e-12
CEACAM19	1.37146	6.728e-08
MGMT	1.37096	1.60712e-07
PDZD2	1.3708	4.00142e-09
WBP1L	1.37044	3.16587e-12
EXD3	1.37031	2.08117e-08
FBXO25	1.36789	1.78444e-07
DPYSL4	1.36504	6.55908e-08
LHX6	1.3645	2.89456e-07
EFEMP2	1.36334	2.17817e-13
RHBDF1	1.36255	7.88973e-11
CD93	1.36055	9.31928e-16
LTBP2	1.35962	4.90929e-15
ZMAT3	1.35912	4.06024e-13
TBCK	1.3583	1.59346e-09
F11R	1.35536	1.42632e-14
LIMS1	1.35484	1.32492e-14
PLTP	1.3528	2.99249e-09
EPB41L5	1.35179	9.61264e-10
MARCKSL1	1.34905	1.99041e-14
DCHS1	1.34824	2.46962e-14
NPIPB13	1.34625	1.25103e-08
TVP23C-CDRT4	1.34588	3.60142e-07
DENND11	1.3441	8.07711e-13
LAMB2	1.34242	2.3775e-14
APOL3	1.3417	6.64975e-09
OS9	1.34095	1.17792e-09
ASAP3	1.33767	5.38576e-09
PINK1	1.33533	2.57218e-08
CERCAM	1.33527	5.80699e-11
MAST4	1.33392	4.24703e-14
HSPA2	1.33286	2.24132e-08
TCTN1	1.32997	2.2331e-09
WFS1	1.32686	3.72424e-13
APBB3	1.32686	3.75875e-07
LINC00963	1.32584	1.56633e-10
PIK3C2B	1.32355	1.03336e-10
TP53INP2	1.32281	2.09355e-12
DDAH2	1.31905	5.73072e-11
SQSTM1	1.31877	4.42672e-15
CREG1	1.31623	8.92733e-10
TIE1	1.31611	3.07992e-15
EFNB2	1.31282	2.14637e-13
IL1R1	1.30955	2.53635e-09
BPHL	1.3085	4.86816e-08
SPATA18	1.30819	9.41255e-07
LAMP1	1.30676	5.26738e-15
C2CD4B	1.30608	7.02392e-11
ZFP90	1.30363	5.08483e-09
MYO18A	1.30361	3.22771e-10
PLXNB2	1.30324	4.98867e-14
NAGLU	1.29926	3.83776e-12
ATP7B	1.29819	3.88414e-09
ZNF320	1.29602	6.81498e-09
CTNNBIP1	1.29567	2.16705e-10
DAB2	1.2956	4.3431e-15
ARMCX3	1.28868	4.02951e-13
TTC14	1.28862	4.62498e-08
HLA-A	1.28624	2.79098e-11
CFAP54	1.28343	1.1153e-08
ANO2	1.28257	1.33682e-09
PCDH1	1.28177	7.17037e-13
TFPI	1.27929	1.85263e-12
CAVIN2	1.27798	2.85119e-14
FNDC3B	1.27502	1.31121e-14
NUCB1	1.27456	8.25382e-14
ADAMTS7	1.2738	2.12456e-12
NACAD	1.27112	6.99522e-07
TNFAIP3	1.26997	1.65132e-08
SLC26A11	1.26925	1.25492e-09
PRCP	1.26916	1.47932e-14
CCDC159	1.2662	4.48578e-07
PPP2R5B	1.26474	7.28856e-09
ZNF436	1.2642	3.11993e-08
NPIPB12	1.26354	1.43082e-08
TMEM255B	1.26326	3.79294e-10
PTK7	1.26258	6.80579e-13
CHST1	1.2603	1.90013e-11
CYBRD1	1.25843	4.0135e-10
RESF1	1.25834	1.53386e-11
LMBR1L	1.25831	9.02365e-11
TXNDC5	1.2555	3.9382e-16
ZNFX1	1.2553	3.73798e-12
SPARC	1.25313	7.46236e-16
ZBTB7B	1.25004	1.16913e-07
GPR137	1.24967	4.62957e-09
SOX4	1.24934	1.13565e-13
LAMA4	1.24903	7.05375e-15
CACNB3	1.24646	8.50289e-10
ZKSCAN1	1.24644	6.49218e-13
GLMP	1.24448	4.77726e-10
LXN	1.24425	3.49743e-10
ICA1	1.24346	2.029e-09
SEL1L3	1.24316	1.60562e-13
SMARCA1	1.24124	5.31107e-11
ICOSLG	1.2394	1.95322e-08
ATP2B4	1.23852	7.49627e-14
HS1BP3	1.23429	1.35827e-08
MAPK8IP3	1.23412	2.97007e-12
SEMA6D	1.23286	4.36479e-09
ALDH1A1	1.2323	1.56832e-13
GLB1	1.22856	2.09255e-12
TRIM38	1.22806	8.8619e-11
B2M	1.22751	1.31578e-13
EPB41	1.2275	9.46229e-11
PHF21A	1.22683	3.95627e-09
ULK1	1.22621	1.05366e-11
ZNF449	1.22605	6.66361e-07
ZDHHC14	1.22257	2.3085e-10
OSMR	1.21941	1.31937e-09
SH3TC1	1.21673	5.19465e-12
SCPEP1	1.21587	4.67181e-08
DUSP8	1.21551	7.07919e-08
SLC18B1	1.21402	1.62129e-07
CHST7	1.21251	3.89057e-07
POLD4	1.21217	4.51588e-09
EPHX1	1.2097	3.71395e-07
DIPK2B	1.2097	1.80851e-14
GALC	1.20697	3.75664e-09
ABCA2	1.20661	1.0332e-11
ERAP1	1.20647	3.92286e-13
PON2	1.20563	7.18729e-13
PLA2G15	1.20454	1.25768e-08
IGF1R	1.20298	1.34961e-11
NPR1	1.20152	2.08092e-08
GDPD5	1.20036	5.741e-12
NINJ1	1.20001	7.41677e-09
ZBTB22	1.19866	1.329e-07
WBP1	1.19702	1.43317e-09
P3H4	1.19667	1.45168e-10
BRWD1	1.19521	1.1399e-09
PLXNB3	1.19376	1.51568e-10
P2RX4	1.19359	7.0269e-13
TNKS1BP1	1.19272	2.78834e-10
LMBRD1	1.18889	9.55448e-09
POFUT2	1.18826	1.38067e-11
KLHL13	1.18737	3.21309e-08
NYNRIN	1.18736	2.05501e-12
HLA-E	1.18448	6.7853e-12
METRNL	1.18442	1.65412e-08
DENND2B	1.18123	3.50435e-07
NEDD9	1.17881	1.11574e-12
STARD9	1.17751	1.10134e-09
EIF2AK3	1.17619	3.07492e-10
MAP3K10	1.17543	6.20877e-07
PDGFC	1.17489	1.72939e-07
DHRS1	1.17471	6.61667e-07
ZNF785	1.17467	3.2312e-07
RELB	1.1745	1.12329e-07
KCTD13	1.17368	1.90483e-08
CTSS	1.17334	1.97564e-07
IL3RA	1.17198	1.40196e-08
ENPP4	1.17111	2.20186e-07
SPRY1	1.17056	1.5909e-11
PCMTD2	1.16903	2.60993e-10
MAGEH1	1.16861	1.389e-08
PRKAR1B	1.16754	2.96913e-08
CMBL	1.16661	8.75481e-08
ITFG1	1.16616	1.7677e-11
ZSWIM8	1.166	2.25718e-12
IL13RA1	1.16595	3.62763e-13
DNAJB9	1.16472	1.22026e-08
NRP2	1.16463	1.97873e-13
FBXO10	1.16383	9.76799e-08
PLXNA1	1.1636	8.86665e-12
GSTM3	1.16282	1.80449e-07
RRN3P3	1.16103	9.55278e-07
DISC1	1.15928	1.5845e-07
LAMC1	1.15827	1.73894e-14
HBP1	1.15734	3.84724e-10
POU2F2	1.15623	7.46132e-07
SERINC2	1.15611	4.17355e-08
PLK2	1.15549	2.05009e-13
GSN	1.15446	4.55858e-13
GBA	1.15315	1.61643e-11
GNS	1.15297	6.07645e-14
BCL6B	1.15149	5.9266e-07
HIC1	1.1512	1.78429e-08
RFNG	1.15081	6.86271e-10
ARID5B	1.14975	2.16398e-07
PMEPA1	1.14949	6.89326e-10
POLI	1.14359	3.7078e-08
FAM118A	1.14143	3.77464e-09
PTPRB	1.13794	4.11694e-13
ARSB	1.13792	3.39307e-11
BBS1	1.13607	1.80179e-08
ITM2B	1.13553	8.76951e-13
PIK3R3	1.13331	1.77228e-08
THSD4	1.13075	9.85396e-12
LIPA	1.13042	1.19848e-10
GPR107	1.1304	9.63759e-13
SPSB1	1.12953	3.77706e-09
PHETA1	1.12804	1.05354e-08
TRIB2	1.12754	4.98806e-09
LRP10	1.12645	4.22959e-11
ITPKB	1.12618	1.98598e-10
VEGFB	1.12504	7.55294e-10
SYNPO	1.12479	1.44554e-12
EPAS1	1.12259	1.29667e-13
CDH13	1.12128	1.64349e-12
GIMAP7	1.1192	2.61519e-07
NNMT	1.11896	5.53146e-12
DAPK3	1.11849	7.27405e-12
SYT1	1.11779	1.20291e-08
ACAP3	1.11607	1.30574e-09
ZNF189	1.11552	1.68009e-07
CNTNAP3	1.11435	1.83977e-07
FLCN	1.11404	3.36654e-11
ADCY6	1.11354	4.31315e-12
RASD1	1.11341	5.50399e-07
DLG4	1.11334	1.69892e-08
OPTN	1.1132	8.37024e-13
SARAF	1.11247	2.60188e-13
KDM7A	1.11106	5.87263e-07
P4HA3	1.1088	2.0219e-08
PCED1A	1.10571	3.24958e-07
EIF2AK2	1.10566	6.22613e-10
LRFN3	1.10522	1.44515e-07
CALD1	1.09444	8.51394e-14
ARHGEF17	1.09397	3.95415e-12
SLC39A6	1.09328	1.49032e-08
SNX33	1.09282	7.7611e-08
FBXL2	1.09242	1.96482e-07
SLC6A8	1.09089	2.38927e-08
TMEM134	1.09	9.0029e-07
TANK	1.08859	4.09302e-09
EVL	1.08829	5.4343e-10
CEP68	1.08668	2.54017e-09
TRIM5	1.08581	8.71655e-11
KDELR3	1.08531	1.45819e-08
GOLGB1	1.084	1.78701e-11
TBC1D17	1.08253	4.89664e-09
ZNF71	1.08248	7.93621e-08
SIDT2	1.08124	2.08739e-07
DMPK	1.0805	4.73013e-09
COL4A5	1.07904	8.77281e-10
MRNIP	1.07867	3.35129e-09
SPSB3	1.07757	1.76963e-08
ECHDC2	1.076	1.09053e-07
ATAT1	1.07591	3.87842e-07
CD276	1.07383	1.18414e-12
RILPL1	1.0719	3.8951e-08
RALGAPA2	1.07181	2.20843e-10
TSPYL2	1.07109	3.75481e-07
SYNE1	1.0694	1.23226e-10
INHBA	1.06908	5.32834e-10
PAM	1.06901	3.82226e-13
TGFBR3	1.06809	3.32051e-08
TMEM219	1.066	2.77341e-10
DNAJC18	1.06465	2.66643e-08
UBE2H	1.06288	1.60104e-12
PDE4B	1.06027	1.27262e-11
ARL4A	1.05889	4.4914e-08
NAGK	1.05846	5.21638e-11
ZNF83	1.05766	9.91273e-08
PLD1	1.05742	1.21412e-11
BOK	1.0572	7.36182e-11
GOLGA8B	1.05677	5.29043e-11
DNMT3A	1.05614	1.65462e-09
NDN	1.05548	1.41635e-07
RHOBTB1	1.05537	4.77377e-11
MTHFR	1.05529	1.5325e-08
FAM210B	1.05528	6.40362e-11
PILRB	1.05399	7.05564e-08
ZNF358	1.05292	2.42546e-10
PGF	1.05262	8.02789e-12
CARD16	1.05204	3.95414e-08
ACAD10	1.05033	9.84184e-07
SHROOM1	1.0487	5.36962e-08
MTUS1	1.04811	1.92699e-12
RRBP1	1.04707	1.96472e-12
SEMA6B	1.04705	7.29932e-11
TOR1B	1.04619	7.12511e-09
MARK4	1.0443	7.61647e-09
P4HTM	1.04402	5.41521e-09
ST6GALNAC6	1.04246	4.34337e-08
COMMD6	1.04221	1.34315e-08
CBARP	1.04182	3.36256e-08
RASSF2	1.04149	1.51744e-11
CBLB	1.04093	1.19899e-08
TCF7L1	1.04025	1.9963e-08
ELMO1	1.03948	2.46878e-08
TMEM44	1.03919	1.57428e-10
ZFP36	1.03836	2.51826e-07
SERINC1	1.03807	2.29444e-12
GABARAP	1.03793	5.43309e-12
LY6E	1.03762	3.35175e-08
TTC13	1.03677	4.0561e-08
ZNF605	1.03636	5.84287e-07
GADD45A	1.03472	2.05553e-09
FAM234A	1.0335	8.26766e-12
MYLIP	1.03309	2.38604e-07
CHKB	1.03225	1.43885e-08
MYO6	1.03062	6.44031e-12
ATXN1	1.03057	1.45011e-08
OSTM1	1.03011	1.7012e-09
TSPAN6	1.02998	2.01168e-08
ZNF521	1.02969	1.83216e-11
ZNF84	1.02809	1.84637e-08
BSDC1	1.02792	2.62711e-11
ELAPOR2	1.0277	4.21407e-12
MIR22HG	1.02699	7.28339e-09
DGLUCY	1.026	1.66237e-09
PACS2	1.02298	3.62067e-11
ERBB2	1.02297	5.54733e-09
CHPF2	1.0218	7.66222e-07
COL25A1	1.02102	7.32827e-07
ZNF362	1.0177	1.09582e-07
BCORL1	1.01758	5.48926e-07
ARMC9	1.01709	1.65589e-07
EBLN3P	1.01693	5.09379e-09
GIMAP8	1.01494	7.46904e-11
LPAR6	1.01476	6.59655e-07
MVB12B	1.01423	5.14949e-07
MARCHF8	1.01325	3.95974e-09
NCKAP5L	1.01298	1.06651e-09
ITGB3	1.01269	4.28207e-12
MAN1B1	1.01171	1.54579e-10
SGSH	1.00918	7.01191e-11
PGLS	1.00679	2.20269e-09
LAMB1	1.00634	5.35487e-14
TPRG1L	1.00631	1.00304e-10
PIK3CD	1.00499	2.73052e-07
NCSTN	1.00356	1.09582e-11
AP1G2	1.00334	5.00317e-07
ZER1	1.00183	2.35073e-08
TMEM185A	1.00134	5.78376e-07
LRSAM1	1.00091	5.12364e-09
RPS6KA2	1.00061	1.24446e-12
FABP5	1.00008	2.58161e-11
TSKU	0.996777	1.61085e-08
PSEN2	0.995923	4.25095e-07
MROH1	0.994246	1.02401e-09
PDCD1LG2	0.992687	2.18833e-08
ZNF160	0.992486	4.07275e-07
CPT1A	0.992042	1.13916e-11
CALHM5	0.991548	1.35355e-07
TMEM98	0.991258	3.27256e-11
COLGALT1	0.991061	4.3188e-13
ATP6AP1	0.99015	3.95083e-11
ZNF33A	0.98954	5.65336e-08
ACAD11	0.989063	6.60063e-07
RRN3P1	0.988265	3.40618e-08
UACA	0.987455	3.10012e-10
DCUN1D3	0.985641	1.13021e-09
SUSD6	0.981969	1.59445e-09
GMIP	0.980913	4.23193e-07
HAGLR	0.980527	1.44292e-08
ARID4A	0.979903	1.0592e-07
HMGCL	0.97981	2.02287e-07
ERMAP	0.97733	8.37626e-07
AGL	0.976866	1.11319e-07
SLC38A7	0.976717	3.77177e-09
SLC35E2B	0.976343	6.18247e-11
TGFBI	0.97572	5.23749e-08
TCF4	0.974261	3.07043e-12
SOD2	0.973376	8.27142e-11
TTC17	0.972705	1.10832e-10
MGAT4B	0.97092	5.8878e-12
RAB29	0.970099	9.0076e-08
GNPTG	0.969935	2.25026e-09
CBFA2T2	0.96699	1.97127e-07
CD99L2	0.966664	1.19716e-10
NUAK1	0.96322	3.15483e-11
KIFAP3	0.962989	3.08998e-08
TNFAIP2	0.96235	4.49091e-07
KIAA0319L	0.960889	5.54891e-09
PHC1	0.960477	5.30993e-09
APP	0.959776	5.95608e-14
AHCYL2	0.958633	1.78212e-07
CUL7	0.95853	6.30271e-10
PARP6	0.958292	7.84029e-09
GABPB1-AS1	0.957714	2.96427e-08
ST3GAL6	0.956686	5.29354e-08
CLCN7	0.956153	1.64032e-10
SLC43A2	0.95523	1.15613e-10
PRKD2	0.95484	4.27232e-10
NFE2L1	0.954032	1.31842e-11
PEX6	0.953743	2.56669e-07
USP31	0.953587	3.18436e-10
TNFRSF25	0.952832	6.54498e-09
LIMD2	0.952405	2.46689e-07
ACADVL	0.95229	3.4268e-10
LRIG1	0.951882	4.26598e-10
KIAA0895L	0.950217	1.64838e-08
NPC2	0.948183	1.93381e-10
MAPK11	0.944353	4.60571e-09
PCYOX1L	0.944107	7.78063e-08
ARL4C	0.943739	7.24847e-07
MZF1	0.943677	1.11516e-07
IDS	0.942557	1.97411e-10
HERC1	0.939653	4.12646e-10
SNN	0.939438	2.54122e-08
ZSCAN30	0.936415	4.8738e-07
NPIPB5	0.93641	3.04913e-09
LGMN	0.932731	2.97409e-10
FOXO1	0.931928	1.22625e-10
FAM89B	0.930782	6.83364e-09
CLIP2	0.930474	7.39992e-09
GLIPR1	0.929397	2.23583e-10
ARHGEF28	0.928264	3.25344e-11
PGAP6	0.927653	1.35596e-11
PIP5K1C	0.927183	1.17614e-10
SNRPN	0.926321	2.67863e-09
ZNF789	0.926143	9.27965e-07
TPST2	0.925378	8.0527e-10
RAB3D	0.925176	2.79178e-08
CASTOR2	0.924407	1.55601e-07
SPTBN5	0.923991	2.78526e-09
PLSCR1	0.923362	1.30884e-07
PRKAB1	0.923092	1.78054e-07
ABHD4	0.920748	1.81194e-08
IFT27	0.920345	5.6156e-07
IGFBP4	0.919865	1.48558e-11
MRTFB	0.919156	3.50207e-09
NFE2L3	0.918968	2.75965e-11
PBX2	0.918342	3.83093e-10
IFITM3	0.917115	7.45774e-08
BAZ2B	0.916716	8.2664e-08
NUDT4	0.916333	8.59085e-12
RNF44	0.915478	1.58434e-08
GTF2IP1	0.914096	1.14269e-07
NPDC1	0.912528	3.78998e-11
SGCE	0.912518	1.28425e-08
TMEM129	0.912455	1.76408e-07
NXN	0.912347	5.22496e-10
RNF146	0.911514	1.01083e-07
ITGB1	0.910909	1.83012e-13
VGLL4	0.90859	3.7915e-09
LDB1	0.905987	7.51188e-11
ENTPD4	0.90598	3.0759e-10
SYNGAP1	0.905279	4.46594e-07
SYVN1	0.903861	2.29919e-09
CYLD	0.902354	7.91956e-08
EOGT	0.901023	2.91387e-10
LAPTM4A	0.900325	1.03652e-10
LRRC32	0.899345	8.4646e-11
PCYOX1	0.899188	1.9216e-10
CHD6	0.898191	4.92945e-08
FAM8A1	0.89619	3.62829e-07
PML	0.893792	5.26365e-11
TNFAIP1	0.892921	1.56698e-09
TAL1	0.892368	6.09953e-10
MAN2A2	0.891039	1.55177e-10
MT-RNR2	0.890902	2.8188e-13
MOSPD2	0.890385	2.94858e-07
MAP3K12	0.890344	6.28863e-07
ADGRG6	0.890327	1.32527e-10
GABBR1	0.889971	5.51557e-09
RNF103	0.886691	4.08883e-08
CCPG1	0.885645	3.86348e-10
TMTC4	0.885641	1.29902e-08
EPB41L4A	0.885498	6.92919e-07
CLN5	0.884494	3.00993e-07
SPPL2B	0.884381	2.50349e-09
N4BP3	0.881045	9.4726e-10
COL8A1	0.880741	1.59955e-12
APLP2	0.88053	5.44957e-13
FTH1	0.879088	2.58364e-13
STK36	0.878871	2.18243e-07
UBTD1	0.878846	2.03571e-08
SLC37A3	0.8785	3.19983e-08
RGL1	0.876797	1.25906e-09
EVA1A	0.876351	2.18973e-08
H6PD	0.875549	2.12508e-11
MAGED1	0.874063	1.85105e-11
FAM43A	0.873949	7.63829e-12
EMCN	0.873245	2.85026e-08
RHOQ	0.872752	1.47677e-08
FKBP10	0.872272	2.19505e-09
KHNYN	0.870522	1.28805e-10
IL17RA	0.869166	5.84406e-07
ZNF469	0.869144	4.75343e-07
TUBB3	0.868061	1.05088e-11
MMP14	0.867567	4.47166e-10
IER3	0.867416	1.62694e-11
AP5Z1	0.867016	3.9154e-09
BLCAP	0.866503	3.21094e-09
RUNDC1	0.865751	8.47007e-07
ARL10	0.863509	1.51182e-07
JCAD	0.863342	4.3888e-11
TNFRSF14	0.86333	1.32354e-07
PLCG1	0.863177	1.48156e-10
SELENOW	0.862831	1.32084e-10
RNF19A	0.862592	8.5763e-09
STAB1	0.861991	8.77601e-13
ZNF322	0.861916	8.64363e-07
N4BP1	0.861489	2.49925e-08
PXDC1	0.860384	9.85945e-11
TRIM13	0.859273	4.38439e-08
SH3D19	0.857762	7.77941e-11
NADSYN1	0.857288	1.19731e-09
TSC1	0.856266	6.47181e-09
SAMD4A	0.85621	1.17574e-11
CDH5	0.856167	3.9481e-13
MAPK12	0.855041	2.68383e-09
CGNL1	0.854485	3.64571e-07
CABLES1	0.853108	6.17998e-10
IRF1	0.853097	3.95708e-07
EXT1	0.851249	5.53929e-11
TTC28	0.848624	4.27251e-09
LINC00205	0.847463	1.96325e-08
RAB2B	0.846985	9.70064e-07
PELI1	0.846651	3.18008e-08
P4HA2	0.846435	7.26966e-09
PPIC	0.846115	3.60848e-07
EMC10	0.844856	2.41787e-08
CLDN5	0.843925	3.42151e-10
WDTC1	0.843266	1.45517e-08
AGO4	0.842742	8.92022e-08
SEL1L	0.840318	3.34516e-11
GDF11	0.839771	4.9287e-07
C2orf27A	0.839672	6.0859e-08
KDM3A	0.838157	6.17157e-08
KIAA0930	0.836794	8.02809e-10
ZKSCAN8	0.835936	1.40718e-07
BPGM	0.835359	2.43589e-07
P3H1	0.835246	3.72167e-11
GPSM1	0.834668	2.94364e-08
CNTNAP3B	0.834506	2.50127e-08
SOX7	0.834013	4.60941e-11
TMEM63A	0.833237	9.48227e-08
TMSB4X	0.833149	7.93175e-12
ANKRD10	0.825848	1.18322e-07
APOL2	0.8244	2.64627e-07
ESM1	0.824341	2.60998e-12
ADAM17	0.822908	1.57728e-08
TTC3	0.822471	2.91163e-09
HOXB3	0.822236	5.43343e-07
SH3BGRL	0.822222	4.66558e-09
FADS3	0.820763	5.21482e-11
PSMB8	0.820166	4.2656e-07
UAP1L1	0.819558	1.86531e-08
TOM1	0.819039	8.09075e-07
VPS41	0.81878	4.95214e-09
ARMCX6	0.816272	5.61134e-08
GIMAP4	0.815874	2.33482e-10
ATP6V0A1	0.815643	1.41293e-07
CYHR1	0.815442	2.08666e-08
HDAC9	0.814951	4.24964e-07
AK3	0.814347	5.07187e-10
LDB2	0.813725	2.64389e-09
EVI5L	0.812365	5.84199e-07
HDAC10	0.812303	2.4363e-07
FSTL1	0.812294	2.91224e-12
TMEM59	0.811838	2.32731e-10
GIMAP6	0.811608	4.91394e-10
CDK6	0.810088	1.09812e-08
GRK5	0.8093	1.41667e-08
FBXO32	0.808184	1.16099e-07
PDGFB	0.807824	1.40125e-11
NCOA7	0.807121	2.20278e-09
KDM4A	0.806771	4.88816e-09
ZMYM2	0.806105	1.93369e-09
CDH24	0.805386	4.6943e-07
ADAM23	0.805057	4.22784e-08
RIMKLB	0.804046	5.23071e-10
FAM219B	0.801989	2.3397e-08
WDR19	0.800957	2.83607e-07
ECE1	0.800864	1.57151e-11
RHBDD2	0.800232	2.79937e-07
SPNS2	0.798692	2.58209e-09
CCDC92	0.798234	1.76264e-08
NOD1	0.7973	2.80422e-08
NARF	0.79725	2.29236e-08
C5orf15	0.796876	3.07115e-07
MAP1LC3B	0.796411	1.56468e-10
ANKIB1	0.794522	7.04509e-09
SIL1	0.794228	8.44284e-07
ACP2	0.793931	2.9751e-07
STAT6	0.79392	1.4176e-09
ALPK3	0.793898	9.17071e-10
ABHD16A	0.791996	2.00087e-07
GOLGA8A	0.791257	3.01665e-10
EVC	0.788361	1.82609e-08
GRAMD1A	0.787865	1.32601e-09
TM2D2	0.785254	3.85577e-09
MINK1	0.784951	9.8115e-09
STX3	0.783748	3.53211e-09
FAM214B	0.783633	2.06032e-07
RNF141	0.783535	6.98915e-08
NORAD	0.782724	3.43634e-11
FZD6	0.780939	2.20989e-09
PSKH1	0.779962	2.35609e-07
CD109	0.779488	8.24202e-10
TOLLIP	0.777666	1.40426e-08
EPHB4	0.777393	8.89304e-11
TMCC1	0.777092	3.79189e-07
CNP	0.77607	3.39085e-09
FNBP1L	0.775055	9.09194e-09
GFOD2	0.773678	2.24424e-08
SP100	0.773174	4.2885e-08
SLC38A2	0.772489	1.94304e-11
KDR	0.771856	1.52254e-11
STX7	0.770627	8.18689e-09
NPTN	0.767494	4.9809e-09
CDKN1A	0.766968	2.17651e-09
SHTN1	0.766593	9.83949e-07
MALAT1	0.764105	6.10553e-09
FAM114A1	0.763748	7.96928e-10
BTD	0.761014	8.33625e-07
LZTR1	0.760953	2.68455e-08
HIP1R	0.760861	4.07037e-08
AHSA2P	0.760406	9.38597e-08
BNIP3L	0.756188	1.47116e-08
FMNL2	0.75603	9.95514e-08
TMC6	0.754489	2.94098e-09
ATP9A	0.753429	4.26094e-08
LPP	0.752947	6.30825e-09
MKNK2	0.750868	1.72502e-08
STX12	0.750688	6.02308e-09
ZBTB4	0.750429	1.18328e-07
CTSZ	0.749335	1.87368e-09
PGM2L1	0.747232	1.54339e-08
LENG8	0.745557	3.14363e-10
F2R	0.745303	4.75959e-11
RNF130	0.744832	4.62667e-08
PRMT2	0.744674	1.12081e-08
PLEKHO1	0.744493	4.28746e-08
ZBED6	0.743987	4.63069e-07
IL4R	0.742633	2.28629e-09
DNAJC16	0.741205	9.11397e-07
MANSC1	0.740442	2.17354e-09
STIM1	0.740408	6.64418e-08
F2RL1	0.739948	3.23809e-08
ARID4B	0.738026	1.44981e-07
ZDHHC9	0.736217	1.35789e-08
CFLAR	0.735283	1.71619e-10
CCNL2	0.733308	4.94591e-10
XIST	0.730278	3.44792e-09
NFKB2	0.729986	2.06547e-07
FNBP1	0.729682	4.83979e-08
YJU2B	0.728918	2.20726e-07
WDR26	0.727893	2.51963e-10
NLRP1	0.727866	1.94434e-08
MED12	0.725658	1.73605e-08
FHIP2B	0.725185	4.41931e-08
SLC12A4	0.722573	1.54481e-09
LTA4H	0.721227	8.88192e-09
EFEMP1	0.720409	6.5237e-12
AP5M1	0.72025	4.60381e-07
LUC7L	0.719226	3.0412e-08
GON4L	0.716468	7.21451e-09
GGCX	0.715806	2.62588e-07
ZFTA	0.714949	1.59068e-07
RAB5B	0.712705	3.47732e-09
AP2A2	0.711506	1.20525e-09
TMEM50A	0.711485	1.03235e-09
PLBD2	0.709394	2.1232e-09
PDLIM1	0.709072	4.02701e-09
GALNT11	0.708134	1.02216e-07
SLC12A7	0.708035	3.15496e-08
CRAT	0.707639	6.46274e-07
YIPF3	0.707171	8.3477e-09
VPS13C	0.706514	1.95049e-07
GLT8D1	0.704892	2.07443e-07
SIRT2	0.70446	1.5382e-07
EDN1	0.703799	2.38671e-11
KIAA1671	0.703131	1.92908e-08
MYD88	0.700643	2.48604e-07
SEPTIN9	0.699758	4.5242e-09
PLD2	0.699339	6.52026e-07
UTRN	0.699285	1.81037e-09
CDC42BPA	0.69677	3.29928e-10
MERTK	0.696497	6.61609e-08
RTL10	0.69632	1.19775e-07
SELENON	0.695968	9.67563e-11
CHMP5	0.692366	7.98245e-07
RHBDF2	0.691512	4.86858e-07
ITGA5	0.690864	9.11885e-11
DDX17	0.690848	1.02103e-10
CNN2	0.690057	4.10474e-08
FHL3	0.689908	5.11638e-07
WASF3	0.689567	9.52937e-07
KIF3C	0.689158	2.18354e-07
DMTN	0.686914	8.39321e-07
TIA1	0.686534	1.25623e-08
RCN1	0.686402	5.87903e-11
MAN2A1	0.685297	1.33745e-09
RBCK1	0.683221	2.49023e-08
KLHL36	0.681891	3.15852e-07
DVL3	0.681484	9.08082e-09
CDK5RAP3	0.680818	3.90405e-08
CMIP	0.680147	6.06447e-10
SGSM2	0.67799	6.01917e-08
CPD	0.677229	1.41956e-08
TCAF1	0.675643	3.38542e-08
RABAC1	0.674553	5.54969e-08
LHFPL2	0.674247	4.76927e-07
NT5E	0.673562	4.53201e-09
PDIA5	0.673503	9.55787e-08
PIGG	0.673301	1.0499e-07
ZNF587	0.672947	5.91679e-08
ATRN	0.672666	8.28951e-09
DNAJC3	0.670263	2.22332e-08
PSEN1	0.670061	3.17746e-08
ARRB1	0.669518	7.33528e-10
GALNT7	0.669195	2.70176e-08
SERF2	0.667348	6.13958e-08
SLC39A7	0.66561	1.29799e-08
DNAAF9	0.665344	3.73112e-07
RTL8C	0.664835	8.80975e-09
SMAD1	0.664259	2.4321e-08
NIPSNAP1	0.664069	8.38988e-07
PTPRF	0.660949	1.24731e-10
SSH1	0.660725	3.48406e-09
TTYH3	0.659193	2.05124e-09
SCD5	0.657537	1.30702e-07
CD55	0.656473	5.70903e-09
MAGI2-AS3	0.65622	3.28597e-07
HERPUD1	0.656121	4.10063e-08
NFKBIA	0.655595	3.68683e-07
NEU1	0.652942	1.86341e-07
NOMO1	0.6482	4.86567e-10
PRXL2A	0.647118	1.07627e-09
SDF4	0.646334	4.3491e-08
FHL2	0.644732	1.39742e-09
PALD1	0.644414	9.35234e-09
ATP2B1	0.643836	1.58243e-07
NEAT1	0.642839	2.9826e-07
ADAR	0.642561	1.25752e-08
TEAD2	0.639769	8.19971e-08
LZTS2	0.63941	6.54435e-07
ANKS1A	0.635498	6.19827e-07
IRGQ	0.635019	4.92598e-07
RALA	0.634808	3.65167e-10
B4GALT1	0.634376	1.51268e-08
ADGRL2	0.634142	1.29057e-07
CIRBP	0.632855	1.17768e-07
AGPAT1	0.63145	8.47236e-07
WIPI2	0.630973	1.7464e-08
ATP6AP2	0.629392	3.29272e-08
RNF41	0.626882	3.61526e-08
P4HB	0.626411	8.93183e-11
ZBTB40	0.625684	7.66923e-07
TBC1D9	0.624825	1.56217e-08
CSRNP2	0.624379	2.55419e-07
INTS3	0.621244	1.1807e-08
TOB2	0.62086	1.39717e-07
ST3GAL1	0.620614	1.06804e-08
ACVRL1	0.620232	2.26283e-09
DGCR2	0.620124	2.8734e-08
TMEM127	0.61954	4.26923e-08
ATF7IP	0.619082	4.44068e-07
FHL1	0.618311	3.05435e-08
TGFB1	0.618044	8.19425e-09
HECTD4	0.617694	9.34715e-08
ABHD17A	0.616546	1.37844e-07
ERGIC3	0.614433	4.45044e-08
MPST	0.613946	2.16211e-07
AKAP13	0.612593	6.69236e-08
GOLGA2	0.61228	5.00415e-07
EXT2	0.612035	1.79092e-08
ARF5	0.610838	6.19241e-08
C6orf89	0.610821	5.01522e-08
ATP13A2	0.610692	1.38096e-07
RBM5	0.60938	4.99528e-09
FLNB	0.608569	1.02128e-10
CD274	0.607792	1.78001e-07
LMBR1	0.60723	6.89829e-07
NOP53	0.606647	7.21238e-08
WASHC2A	0.606536	8.83333e-07
RABGAP1	0.604573	3.68133e-07
ABCC1	0.601996	1.61602e-08
RRM2B	0.601929	9.27254e-07
GLCE	0.600879	1.75465e-08
KDM4B	0.599246	8.05929e-07
DCAF5	0.598789	1.67822e-07
PIGT	0.598175	2.24543e-08
CYTH1	0.595343	2.00611e-07
SECISBP2L	0.593773	9.45868e-08
RCN3	0.590498	2.3307e-07
ARAP3	0.588442	1.6329e-08
DMWD	0.586993	8.55906e-08
EFCAB14	0.585039	1.06628e-07
ARHGDIB	-0.58497	6.48331e-09
DHX16	-0.585723	5.31509e-07
NUP214	-0.586048	5.66495e-08
ASAP1	-0.590048	2.99757e-08
CACNA2D1	-0.590887	4.95523e-07
RAPH1	-0.592446	2.11259e-07
OGDH	-0.593523	9.14441e-08
WDFY1	-0.593647	3.89856e-08
CD59	-0.594516	2.14329e-10
IARS2	-0.595529	1.92796e-07
MYC	-0.595727	1.2986e-08
GFM1	-0.595868	2.12725e-07
YBX3	-0.596592	1.18873e-09
UQCRC1	-0.596605	4.62643e-08
ERCC2	-0.59757	4.44573e-07
ZNF106	-0.598056	4.78691e-08
STMN1	-0.598387	1.49268e-09
NUS1	-0.59839	4.03167e-07
ARF6	-0.599494	5.27119e-08
ACTR3	-0.599746	3.2025e-09
LARS1	-0.599747	1.42162e-08
PPP3R1	-0.600225	7.97795e-07
KANK1	-0.60278	9.07205e-08
AHNAK	-0.60607	2.91574e-10
EIF3D	-0.606399	3.68828e-09
PITPNB	-0.606756	7.16439e-08
FPGS	-0.607712	3.44117e-07
SLC25A3	-0.608176	1.47604e-09
USP14	-0.608389	2.23522e-07
PDCD11	-0.608475	3.39671e-08
TBL1XR1	-0.608809	1.76002e-07
S100A10	-0.608826	3.28436e-08
RANGAP1	-0.60953	2.36706e-08
UBE2D3	-0.610366	3.4495e-09
SUMO3	-0.610915	2.78208e-07
SGTA	-0.613826	1.18609e-08
GPX1	-0.614303	4.82478e-09
CALCRL	-0.615032	2.82122e-08
SRRT	-0.616583	1.85601e-07
ENAH	-0.617479	3.08476e-08
NRDC	-0.620698	5.02261e-09
CHTOP	-0.621192	2.69338e-07
SNW1	-0.621575	3.35439e-07
PYCR2	-0.622684	3.71962e-07
LARP1	-0.626145	6.30187e-10
ANXA11	-0.627901	7.82878e-07
CAPRIN1	-0.627914	9.41855e-10
CNRIP1	-0.628708	1.78358e-07
SLC35F2	-0.629206	1.77932e-07
CHERP	-0.629259	4.92549e-08
SUGT1	-0.630275	2.15673e-07
CNOT6L	-0.630371	4.01335e-07
MFN2	-0.630466	7.68153e-09
PRPF40A	-0.630498	3.12779e-07
CASP3	-0.630558	4.83059e-07
SRSF10	-0.631666	9.2705e-09
ANXA3	-0.634554	4.9628e-08
SSU72	-0.635124	3.15763e-08
DUS1L	-0.635207	7.02865e-08
PLRG1	-0.635814	1.78489e-07
PSMA7	-0.636267	2.9655e-09
OGFOD1	-0.636273	5.31602e-08
LDLR	-0.636713	2.98868e-09
UGP2	-0.636788	9.55577e-07
PRKACB	-0.637025	3.74696e-08
ABHD2	-0.637538	5.93174e-08
PSMC5	-0.637738	5.35799e-07
SF3B2	-0.638975	8.85694e-09
PGRMC1	-0.639021	9.48528e-08
POLR2E	-0.63987	1.96723e-08
SOGA1	-0.640438	1.00669e-08
EIF3C	-0.642553	2.49877e-10
ANXA7	-0.642562	3.47553e-08
ATP5F1C	-0.642789	1.06051e-08
PWP1	-0.64364	3.14998e-08
CDV3	-0.644899	4.69258e-10
COPS8	-0.645165	2.43525e-07
PSMD7	-0.645325	9.58117e-09
RCC1L	-0.645996	5.84874e-07
UBQLN1	-0.646943	9.7903e-09
MLEC	-0.647561	5.70865e-09
NOS3	-0.648836	2.43684e-08
TSN	-0.650309	1.80072e-08
BLMH	-0.650826	3.49402e-07
ARHGDIA	-0.651825	1.00835e-08
UBE2L3	-0.653219	1.64044e-08
TNPO1	-0.653734	3.28975e-08
BCLAF1	-0.654747	1.25346e-08
NIN	-0.654977	3.97101e-07
BAG3	-0.655406	1.56108e-08
LINC02969	-0.656506	5.84879e-07
SWAP70	-0.656755	3.48013e-10
RNPEP	-0.656895	4.78052e-08
PTPN1	-0.65726	2.75197e-09
BCAR1	-0.659347	4.86687e-10
SRP68	-0.659729	2.81363e-08
MAP2K3	-0.660742	9.80915e-07
AEN	-0.660776	7.91194e-07
DDX41	-0.661293	3.36066e-07
ACACA	-0.66153	1.67626e-08
HS2ST1	-0.66216	2.1216e-07
HECW2	-0.663099	3.74483e-09
WTAP	-0.663422	2.46256e-07
THRAP3	-0.663723	1.57994e-09
CHD1	-0.664285	1.63268e-07
SLC3A2	-0.664626	1.48307e-08
STARD7	-0.664811	1.71973e-09
SEPTIN7	-0.665983	7.70152e-09
PRDX1	-0.667475	2.48121e-10
PNRC2	-0.667918	6.29209e-08
EPB41L2	-0.667939	1.04778e-07
RNASEH1	-0.668165	8.49847e-08
HIPK2	-0.668378	9.56411e-08
TMEM47	-0.669423	3.91461e-07
LOX	-0.670352	4.2738e-07
CITED2	-0.671493	8.41055e-09
B4GALT2	-0.67154	1.01572e-08
PABPC4	-0.672336	1.10158e-09
BZW2	-0.675532	8.84121e-09
PSMA3	-0.675843	5.16699e-08
ZC3H18	-0.676012	5.91217e-07
METAP1	-0.676709	6.9615e-07
SART3	-0.676774	8.35265e-08
SARS1	-0.676783	2.96612e-09
PPP1R8	-0.677961	4.84884e-07
ATF4	-0.679882	2.45384e-09
KATNAL1	-0.679985	8.8695e-07
DNAJC8	-0.681239	2.99067e-09
MAPK1IP1L	-0.682217	3.4246e-09
DDX19A	-0.68235	1.00679e-07
MATR3	-0.683262	4.03952e-09
STRAP	-0.683467	1.05218e-09
NRCAM	-0.683677	2.46029e-09
PTP4A2	-0.683824	3.44484e-09
NIPA2	-0.685033	1.55402e-08
AP1M1	-0.685363	4.58759e-09
PSMA1	-0.687019	6.46901e-08
EWSR1	-0.68708	3.93398e-10
HTR1B	-0.687323	4.05947e-07
SLC16A1	-0.68826	2.34221e-09
TLNRD1	-0.688376	5.83494e-09
STK24	-0.68885	2.39263e-08
ABCF1	-0.688995	3.51641e-07
CCDC14	-0.69039	2.14934e-07
MAPKBP1	-0.691145	4.20853e-08
UPF2	-0.69131	5.0516e-07
PSMB3	-0.691609	2.4781e-08
GNB4	-0.692364	7.24551e-09
PSMC6	-0.692473	3.70487e-08
QTRT2	-0.69254	3.44775e-07
PTDSS1	-0.693056	9.66519e-09
GLRX3	-0.693962	1.40243e-08
DRG1	-0.69416	6.5445e-07
NUP133	-0.694879	9.9448e-08
DUSP6	-0.695029	1.90444e-09
EXOSC10	-0.695201	6.48498e-09
PRELID3B	-0.695487	9.41521e-07
NBN	-0.695778	2.66926e-07
ATP5F1A	-0.695858	3.74135e-10
PNN	-0.696842	1.12943e-08
DNAJC11	-0.698139	3.2757e-08
NAA10	-0.698341	3.85521e-08
ENSA	-0.698424	9.01225e-08
SLC2A1	-0.699774	8.1114e-07
ANAPC7	-0.700077	1.95291e-08
SEPTIN10	-0.700694	2.84089e-07
AMOTL1	-0.700731	2.06483e-08
FLT1	-0.701469	7.24894e-10
UBTF	-0.701518	5.39325e-08
TNPO3	-0.701843	2.3382e-08
ANKRD40	-0.701985	9.92646e-09
PARK7	-0.702025	1.56063e-07
IMMT	-0.702618	8.80848e-09
POLDIP2	-0.702934	4.36723e-08
PSMA5	-0.703411	2.59712e-08
SNRPB2	-0.704255	4.28845e-07
PSME3	-0.705671	4.14069e-10
DNMBP	-0.706073	2.18116e-09
FAM126A	-0.706521	7.51276e-08
CUL4B	-0.706712	6.26273e-09
VANGL1	-0.70722	9.52433e-08
GNL3L	-0.707607	3.36675e-08
PAF1	-0.708415	2.03627e-07
FAM241A	-0.708653	5.16062e-08
NELFCD	-0.709064	1.0964e-08
PIGK	-0.709138	4.89496e-07
HIGD1A	-0.71069	2.73597e-08
GHITM	-0.711847	1.02284e-09
RASSF1	-0.713531	8.92565e-07
FLNC	-0.714386	5.50519e-10
TWF1	-0.71439	5.25919e-08
PCNP	-0.715044	3.7923e-08
SRPRB	-0.715165	4.73388e-08
IMP3	-0.715469	4.99064e-07
PPP1R15B	-0.715499	6.5891e-09
PHB2	-0.716989	7.54093e-08
RBM19	-0.717235	3.3654e-07
CDK16	-0.7173	6.73323e-09
NAMPT	-0.717331	2.38774e-09
HDAC2	-0.718114	1.06881e-08
NANS	-0.718774	1.43497e-07
NFIC	-0.719479	1.90998e-09
SELENOT	-0.719571	9.33767e-09
HMGN1	-0.720798	2.1924e-10
SNRNP200	-0.721317	1.61838e-10
CHUK	-0.721421	8.04757e-07
ACOT7	-0.721538	5.30638e-09
PCYT2	-0.721826	7.54249e-07
LSS	-0.722896	3.05917e-09
TNIK	-0.723003	5.99949e-08
NPC1	-0.72385	3.9198e-07
SFRP1	-0.72402	2.8276e-09
ZDHHC13	-0.72414	1.23322e-07
RHEB	-0.72414	2.4377e-08
HNRNPDL	-0.724525	1.34963e-10
ZC3H4	-0.724559	6.86408e-08
PFN1	-0.724949	8.29064e-10
CDK4	-0.725082	1.45125e-09
PHACTR4	-0.725161	8.01719e-08
PIK3CB	-0.725534	7.28865e-07
MMADHC	-0.72637	1.2949e-08
FEZ2	-0.726974	1.13208e-08
VTA1	-0.727084	1.29762e-07
DDX47	-0.727235	5.90134e-08
EIF6	-0.728283	1.57589e-08
LYRM2	-0.728702	3.61979e-07
MAZ	-0.729033	2.89845e-10
BUD23	-0.729077	2.5312e-07
TDG	-0.730454	4.48663e-07
CAPZA1	-0.730946	3.27034e-08
PPFIBP1	-0.731453	1.10524e-08
PSMA2	-0.731731	1.64745e-08
LAS1L	-0.731969	2.39752e-07
CHORDC1	-0.732106	4.99719e-08
SRSF4	-0.732391	3.00281e-09
AKAP12	-0.732467	7.37345e-12
ADRM1	-0.733363	3.29552e-09
VMA21	-0.733464	3.88515e-08
INO80	-0.733949	1.82893e-07
RDH11	-0.733971	4.14895e-09
USP7	-0.734326	3.77824e-10
GTF3C4	-0.734418	1.36422e-08
CRY1	-0.734485	9.26009e-07
NAP1L4	-0.734647	5.02946e-10
ACADM	-0.736285	4.20096e-07
SLC25A24	-0.736563	2.37482e-08
OLA1	-0.739266	4.66147e-09
C2CD5	-0.740169	8.86705e-07
HSPA4	-0.740952	3.07423e-10
MCRS1	-0.741276	4.53413e-07
MTA2	-0.741556	1.94657e-09
EIF2B1	-0.741584	4.08817e-08
GTF2A2	-0.741769	8.8137e-07
ZZZ3	-0.742766	2.77045e-07
DPP9	-0.743589	7.24821e-10
NDUFA6	-0.743612	9.38921e-07
THADA	-0.744752	5.74997e-07
LSM12	-0.74498	6.67462e-08
PSMD5	-0.745842	2.61926e-08
PSME4	-0.745969	8.5468e-09
MRPL30	-0.74678	1.12505e-07
YWHAQ	-0.747712	3.65045e-11
PAPSS2	-0.747714	6.22174e-10
TAF2	-0.749945	6.15157e-08
GLUL	-0.750221	4.53704e-09
NIBAN2	-0.751131	7.93653e-11
HPCAL1	-0.75137	9.77755e-09
AARS1	-0.752708	6.749e-10
BCL7B	-0.752717	2.33208e-07
TOP1	-0.752774	2.50846e-10
CCND3	-0.752856	1.42804e-08
SSB	-0.753028	2.17885e-08
HSPH1	-0.753423	1.86005e-09
CPSF6	-0.754008	2.34516e-09
SEPHS1	-0.754367	2.24792e-07
ELAC2	-0.754425	4.59128e-09
MEMO1	-0.75484	5.20395e-07
EIF3M	-0.757379	4.77159e-09
LONP1	-0.757387	3.76358e-08
SLC4A1AP	-0.757783	5.76409e-08
NAV2	-0.75828	1.46493e-09
QSER1	-0.758478	3.91039e-07
MANEA	-0.759297	2.76459e-07
SSBP1	-0.759859	1.57112e-08
IRAK1	-0.759889	7.49205e-10
PLPBP	-0.760869	5.11737e-08
ANXA2	-0.761221	1.05559e-12
ACTB	-0.761325	9.3596e-13
PYURF	-0.761673	4.04088e-09
STARD13	-0.761982	2.73993e-07
ERCC6	-0.761991	4.31596e-08
RPUSD1	-0.762106	9.347e-07
RNPS1	-0.762425	7.56673e-10
EZR	-0.762443	6.20003e-10
EI24	-0.762811	7.85253e-10
DHX30	-0.763105	5.86042e-10
QSOX2	-0.763405	4.34078e-09
CAPN15	-0.76414	3.9366e-09
ARHGAP23	-0.764464	1.11479e-09
DDX1	-0.764826	5.59785e-10
EIF3A	-0.764888	1.69096e-11
TMEM109	-0.765283	8.94159e-11
TRIB3	-0.7665	3.74826e-07
SRP9	-0.76652	5.2673e-10
ODF2	-0.766829	5.1537e-09
SCRIB	-0.766955	8.92286e-08
MEF2C	-0.768168	2.32416e-07
MRPL32	-0.76873	6.35378e-07
CAVIN3	-0.769632	2.68927e-09
CDC5L	-0.769962	3.86883e-08
KPNA4	-0.770758	3.18198e-10
YAP1	-0.771461	2.27916e-08
TOMM70	-0.771508	8.97391e-09
ANXA1	-0.771767	6.84501e-11
GLUD1	-0.772017	2.6855e-10
ARSJ	-0.772179	9.27151e-10
MBD2	-0.772572	2.68675e-09
KMT5A	-0.773485	4.1549e-08
ASCC3	-0.773554	4.1774e-09
RBMX	-0.77505	7.75444e-11
GNAI3	-0.775227	3.17387e-09
FJX1	-0.775251	2.8392e-08
CFL2	-0.775647	1.42421e-07
IDH1	-0.776706	6.69231e-10
VAPA	-0.777123	4.76853e-09
CORO1C	-0.77728	3.26733e-11
MRPS15	-0.777408	1.22838e-07
SEPTIN6	-0.778429	2.42995e-07
BCAR3	-0.779364	3.40581e-07
PRXL2B	-0.779463	9.03861e-09
USP12	-0.779926	7.04882e-09
MPRIP	-0.780407	1.84704e-11
RDX	-0.780915	1.3834e-09
TIMM13	-0.781107	1.39714e-07
RABL3	-0.78275	7.75688e-07
TBL1X	-0.783526	1.86808e-07
TFRC	-0.783696	1.80494e-09
AHCTF1	-0.784079	3.81065e-09
MSTO1	-0.784916	1.93281e-07
RUSC2	-0.785165	1.84655e-09
MDN1	-0.786508	8.14319e-09
CBX1	-0.786699	1.09384e-08
CBX6	-0.786753	1.10035e-08
CAP1	-0.786837	5.84073e-11
SDHD	-0.787165	4.12682e-07
TXN	-0.787297	7.39615e-10
API5	-0.787938	6.32863e-10
EIF5B	-0.788038	3.4689e-10
TRIB1	-0.788808	4.85811e-07
ABCC4	-0.789341	1.69394e-07
SYNJ2	-0.789414	2.04591e-10
YARS2	-0.791262	1.27521e-07
SBDS	-0.791747	4.55852e-10
ALDH3A2	-0.791935	3.17375e-07
HNRNPUL1	-0.792001	1.16909e-09
CLASP2	-0.792274	7.25982e-09
MAPK14	-0.792418	9.12908e-10
ZNF22	-0.793168	2.70794e-07
POLR2B	-0.793524	4.87793e-11
MBD3	-0.793577	4.11731e-08
AHR	-0.793959	2.29758e-07
ZNF710	-0.794056	4.05821e-07
GARS1	-0.794139	1.94539e-10
LPIN1	-0.794281	2.05737e-09
IMPDH1	-0.795406	6.62958e-09
PURB	-0.795806	2.77498e-09
CNOT9	-0.79593	1.0316e-08
GBE1	-0.796136	3.61269e-10
R3HDM1	-0.796217	6.83894e-08
RAP1GDS1	-0.796901	3.52005e-09
IPO8	-0.797505	4.0991e-09
EIF4H	-0.797508	3.70421e-09
GLRX5	-0.797694	4.37675e-07
CCDC88A	-0.799193	1.08709e-08
SLK	-0.799367	2.29555e-08
LRPPRC	-0.799466	2.88226e-09
KNOP1	-0.799686	5.63128e-07
ALDH16A1	-0.799858	4.34406e-08
RECQL	-0.80012	1.46977e-08
CD320	-0.800266	3.28615e-09
PSMD1	-0.800395	9.86693e-11
AK2	-0.800402	9.64398e-10
RSL24D1	-0.800907	2.63309e-08
HTATSF1	-0.800953	3.13823e-09
PSMC1	-0.801455	5.57383e-10
TECR	-0.802316	1.90446e-07
AQR	-0.802688	1.5647e-08
CRKL	-0.803704	3.64425e-10
RAPGEF6	-0.803791	6.73905e-07
GNL2	-0.804386	2.18015e-08
HRAS	-0.806287	1.04359e-07
CALM3	-0.806482	1.45585e-11
PSMD3	-0.806784	4.93462e-09
EIF2A	-0.806884	3.6284e-08
JPT2	-0.806921	1.40735e-10
CHCHD2	-0.808041	7.1562e-11
ARL6IP1	-0.808252	1.17195e-08
UBE2K	-0.8084	4.64354e-09
TBC1D8	-0.808806	4.00622e-08
MTHFD1L	-0.810627	1.33943e-10
LETM1	-0.810836	1.79799e-09
MRPL38	-0.812139	4.97038e-07
CCNC	-0.812974	3.76299e-08
PCBP1	-0.813432	1.69786e-11
RAB5IF	-0.814201	7.65125e-08
RPS6KB2	-0.814411	6.81004e-07
SF3B4	-0.816512	8.32285e-09
PHB1	-0.817094	2.67212e-10
TAGLN2	-0.817246	1.4054e-11
TPM3	-0.817312	1.33284e-12
YWHAE	-0.818844	3.24837e-12
MARS1	-0.818939	1.13101e-10
VDAC1	-0.819638	8.54971e-11
OGFRL1	-0.820485	2.19735e-08
TMX1	-0.820791	3.55963e-09
DPH2	-0.821236	1.56219e-07
METTL16	-0.821592	3.21524e-07
TRMU	-0.822796	7.1032e-08
AAAS	-0.823339	4.88683e-07
LSG1	-0.823669	2.26386e-09
PPID	-0.826122	1.2378e-07
METTL13	-0.826275	5.68432e-07
ALDOA	-0.827331	6.83261e-12
RBMS1	-0.828543	3.63629e-10
RBM12	-0.828979	2.89643e-10
CCAR2	-0.829015	5.37848e-09
ZFP91	-0.829331	4.24778e-10
PSMD10	-0.829604	5.30234e-09
CUL1	-0.829852	8.10143e-09
NUDT5	-0.830392	7.53048e-09
SLC39A14	-0.832175	3.52385e-10
PGAM1	-0.832831	9.9587e-12
WEE1	-0.833567	6.82023e-09
CS	-0.833675	1.28591e-11
EIF2B5	-0.833753	2.23001e-09
MRPL42	-0.833912	3.16773e-08
LRRFIP1	-0.834655	4.10126e-11
TACO1	-0.834679	6.96064e-07
PKIA	-0.834915	4.30646e-08
PGK1	-0.835065	6.99728e-12
PRPF31	-0.835337	2.25032e-09
GATAD2A	-0.835512	3.22547e-10
COPS2	-0.83702	4.57779e-09
GLO1	-0.83714	4.45398e-09
KPNA3	-0.837208	1.76954e-09
EML4	-0.83924	4.41074e-07
DYNC1LI1	-0.839432	6.76422e-09
CPSF3	-0.840252	4.13074e-08
SPATS2L	-0.840326	3.41587e-09
KARS1	-0.841839	8.66445e-11
TTLL5	-0.842869	6.05881e-09
RPSA	-0.843477	1.14597e-12
EIF2S2	-0.843706	1.2809e-10
GTPBP6	-0.844818	5.44271e-09
KIAA0040	-0.845446	4.70187e-08
LRRC40	-0.845857	1.30398e-07
ARPC5L	-0.84678	5.65463e-10
SERPINB8	-0.846824	1.80902e-08
APPL1	-0.847556	9.95008e-08
COX8A	-0.848093	2.73805e-07
RBM17	-0.848195	1.0411e-09
EIF4G1	-0.848495	1.29096e-11
ATP5PB	-0.848625	1.19414e-10
NSUN2	-0.848883	1.0329e-10
USP39	-0.848945	1.48902e-08
GALE	-0.849457	2.6754e-07
SFPQ	-0.849905	2.66048e-12
MRPL16	-0.851157	1.60947e-07
TENT4A	-0.851505	1.53464e-08
NAGA	-0.851899	1.08527e-08
EMP1	-0.852539	1.58659e-12
TOP3A	-0.852706	9.12037e-08
ARL6IP6	-0.853304	2.60004e-08
DDAH1	-0.854939	2.51425e-08
E2F4	-0.855073	1.39903e-10
RFLNB	-0.85554	7.65869e-10
RAVER2	-0.85628	5.85711e-07
GXYLT1	-0.856475	2.2753e-08
PTPN11	-0.856734	9.72062e-11
ELOC	-0.856917	7.42347e-09
DOCK7	-0.857738	9.83762e-08
PTPMT1	-0.857818	9.38554e-07
ST6GALNAC4	-0.857878	5.84869e-08
TM4SF18	-0.857942	1.89081e-10
GMPPB	-0.858113	1.63251e-08
PABIR2	-0.85845	2.7922e-08
H3-3B	-0.858504	6.17448e-12
G6PD	-0.858528	1.75133e-10
SNRPD3	-0.859942	2.13003e-09
MOSMO	-0.860175	8.90064e-07
CTCF	-0.860837	2.09373e-09
[truncated: 1,500 more rows]
